# Supplementary material for: Metabolomics reveals the response of hydroprimed maize to mitigate the impact of soil salinization
Source: Front Plant Sci. 2023 Jun 7;14:1109460. doi: 10.3389/fpls.2023.1109460 (PMC10282767; doi:10.3389/fpls.2023.1109460)
Supplement: Supplementary file 7 [file Table_6.xls]

## Sheet: Sheet1
#ID	name	ctrwat-1	ctrwat-2	ctrwat-3	ctrsal-1	ctrsal-2	ctrsal-3	hydsal-1	hydsal-2	hydsal-3	A_vs_B_log2FC	A_vs_B_Pvalue	A_vs_B_VIP	A_vs_B_(FC_1_Pvalue_0.05_VIP_1)_regulated	B_vs_C_log2FC	B_vs_C_Pvalue	B_vs_C_VIP	B_vs_C_(FC_1_Pvalue_0.05_VIP_1)_regulated	Mass Error (ppm)	Formula	m/z	Retention time (min)	KEGG_annotation	KEGG_pathway_annotation	LM_ID(lipidmaps)	CATEGORY(lipidmaps)	MAIN_CLASS(lipidmaps)	SUB_CLASS	HMDB_ID	CAS	kingdom(HMDB)	super_class(HMDB)	HMDB_taxonomy	sub_class(HMDB)	species
neg_10073	4'-Apo-beta,psi-caroten-4'-al	181928	176454	190947	4847.96	4275.43	5142.81	2306.53	2634.81	2467.13	-5.267	0.000538132	1.12894	down	-0.945352	0.00638414	1.1322	down	14.3419	C35H46O	481.355	9.97292	C19892	Carotenoid biosynthesis(ko00906);;Metabolic pathways(ko01100);;Biosynthesis of secondary metabolites(ko01110)	LMPR01070596	Prenol Lipids [PR]	Isoprenoids [PR01]	C40 isoprenoids (tetraterpenes) [PR0107]	--	--	--	--	--	--	--
neg_1215	8-Demethyl-8-alpha-L-rhamnosyltetracenomycin C	629.587	662.162	589.71	542.134	524.193	535.788	508.143	503.855	515.088	-0.231875	0.0402052	1.02547	down	-0.0691961	0.022096	1.04313	down	-7.95481	C28H28O15	625.113	0.804633	--	--	--	--	--	--	--	--	--	--	--	--	--
neg_1332	Methylmalonic acid	234.096	254.379	265.368	130.335	120.643	126.637	99.4702	96.7894	112.778	-0.997347	0.00286085	1.11739	down	-0.289135	0.0248619	1.04166	down	16.8784	C4H6O4	117.021	1.01197	C02170	Pyrimidine metabolism(ko00240);;Valine, leucine and isoleucine degradation(ko00280);;Propanoate metabolism(ko00640);;Metabolic pathways(ko01100)	LMFA01170118	Fatty Acyls [FA]	Fatty Acids and Conjugates [FA01]	Dicarboxylic acids [FA0117]	HMDB0000202	516-05-2	Organic compounds	Organic acids and derivatives	Carboxylic acids and derivatives	--	Microbe,Animals,Plants
neg_1638	3,6-Dihydronicotinic acid	849.349	834.425	894.278	519.796	438.929	446.982	323.322	338.88	355.718	-0.874987	0.000448569	1.116	down	-0.46567	0.0263035	1.07116	down	16.3159	C6H7NO2	124.042	1.78908	--	--	--	--	--	--	--	--	--	--	--	--	--
neg_1639	N-Acetyl-beta-alanine	1069.45	1043.29	1121.99	819.781	779.581	752.433	541.201	592.771	622.806	-0.459882	0.000718743	1.10705	down	-0.42083	0.00340929	1.11062	down	32.5461	C5H9NO3	152.037	1.78908	C01073	beta-Alanine metabolism(ko00410)	--	--	--	--	HMDB0061880	3025-95-4	Organic compounds	Organic acids and derivatives	Carboxylic acids and derivatives	--	Animals
neg_1808	(R)-3-((R)-3-Hydroxybutanoyloxy)butanoate	41.7839	40.6292	40.5404	15.3399	11.9563	15.1832	3.51191	5.07053	2.90402	-1.53328	0.000548291	1.12592	down	-1.88683	0.00301515	1.12956	down	7.79715	C8H14O5	189.078	1.97498	--	--	--	--	--	--	--	--	--	--	--	--	--
neg_1881	3'-Hydroxyechinenone	182.449	184.681	203.064	133.216	132.665	104.046	40.0513	70.6458	28.1063	-0.624215	0.00671092	1.06736	down	-1.4142	0.00996846	1.07447	down	44.3258	C40H54O2	611.436	10.1081	--	--	--	--	--	--	--	--	--	--	--	--	--
neg_2169	13(S)-HOT	2933.13	2692.74	2621.72	526.935	578.952	592.719	279.037	272.799	303.025	-2.27962	0.0012496	1.12576	down	-0.990591	0.0014284	1.14937	down	3.51535	C18H30O3	587.434	10.9217	--	--	--	--	--	--	--	--	--	--	--	--	--
neg_2212	1-Methylhistamine	24769	22707.9	31870.9	3915.56	4086.23	4462.56	1908.8	1995.8	2024.2	-2.67038	0.0148997	1.0966	down	-1.07199	0.00401589	1.15038	down	11.3198	C6H11N3	309.207	11.1212	C05127	Histidine metabolism(ko00340);;Metabolic pathways(ko01100)	--	--	--	--	HMDB0000898	501-75-7	Organic compounds	Organic nitrogen compounds	Organonitrogen compounds	--	Animals
neg_2219	Avermectin B1b monosaccharide	883.142	825.879	874.014	121.837	139.548	145.137	44.4863	58.1528	53.6936	-2.66766	0.000118217	1.1286	down	-1.37872	0.00149589	1.1421	down	-17.8729	C40H58O11	759.383	11.1283	--	--	--	--	--	--	--	--	--	--	--	--	--
neg_2736	Neobavaisoflavone	142.987	147.514	156.785	101.971	97.6375	101.598	64.542	62.8758	72.7328	-0.570445	0.003478	1.11317	down	-0.589668	0.00281042	1.14117	down	17.0968	C20H18O4	321.119	2.18877	--	--	LMPK12050027	Polyketides [PK]	Flavonoids [PK12]	Isoflavonoids [PK1205]	HMDB0255518	--	Organic compounds	Phenylpropanoids and polyketides	Isoflavonoids	--	Animals,Plants
neg_2747	4'-Demethylpodophyllotoxin	251.711	232.935	241.373	34.1887	49.6432	60.7219	3.00051	9.46714	5.70054	-2.3284	7.32426e-05	1.12481	down	-2.99212	0.0262424	1.0893	down	4.27854	C21H20O8	421.092	2.20307	--	--	--	--	--	--	--	--	--	--	--	--	--
neg_2832	1-Hydroxy-2-naphthaldehyde	127.334	125.681	134.375	91.6466	84.9707	81.355	68.8015	65.2092	62.7692	-0.586569	0.000463853	1.11114	down	-0.390633	0.0082027	1.10034	down	-0.101889	C11H8O2	207.022	2.26027	--	--	--	--	--	--	--	--	--	--	--	--	--
neg_2851	Tryptophyl-Glutamate	19213.7	19794.4	20446.2	8201.78	7349.19	7193.59	3977.65	3844.98	4447.17	-1.38626	1.53859e-05	1.12692	down	-0.890409	0.00176693	1.13885	down	-5.59881	C16H19N3O5	368.1	2.26742	--	--	--	--	--	--	HMDB0029082	--	Organic compounds	Organic acids and derivatives	Carboxylic acids and derivatives	--	Animals
neg_3171	Minoxidil	282.675	269.784	269.873	18.7112	19.3811	20.4553	11.3553	11.6531	3.90248	-3.81204	0.000236609	1.12954	down	-1.12142	0.048382	1.0444	down	17.2493	C9H15N5O	230.106	2.55268	--	--	--	--	--	--	HMDB0014494	38304-91-5	Organic compounds	Organic nitrogen compounds	Organonitrogen compounds	--	Animals
neg_3272	(S)-5-Amino-3-oxohexanoic acid	377.779	402.349	374.603	208.169	233.72	209.259	173.862	166.525	170.728	-0.8265	0.000159044	1.11871	down	-0.349339	0.0246415	1.09081	down	28.0104	C6H11NO3	166.053	2.60988	C03656	Lysine degradation(ko00310);;Metabolic pathways(ko01100)	LMFA01060173	Fatty Acyls [FA]	Fatty Acids and Conjugates [FA01]	Oxo fatty acids [FA0106]	HMDB0012131	19355-90-9	Organic compounds	Organic acids and derivatives	Keto acids and derivatives	--	Animals
neg_3382	4-Hydroxyindole	112.112	98.7284	157.182	33.1179	27.8406	33.4682	18.6065	21.6477	20.1581	-1.96253	0.0344082	1.05302	down	-0.644353	0.0124433	1.09628	down	7.01357	C8H7NO	178.052	2.7307	--	--	--	--	--	--	--	--	--	--	--	--	--
neg_3416	Ureidoacrylate	240.727	235.009	264.938	138.39	149.163	145.075	80.7049	83.6982	80.4329	-0.775713	0.00409618	1.11055	down	-0.82131	0.00104841	1.15675	down	-0.235336	C4H6N2O3	305.074	2.75215	--	--	--	--	--	--	--	--	--	--	--	--	--
neg_3440	Strychnine	749.122	667.024	773.337	145.064	140.516	181.88	75.7082	93.4597	56.8281	-2.22767	0.000960882	1.12194	down	-1.04855	0.00975531	1.07376	down	-5.60365	C21H22N2O2	379.164	2.7593	--	--	--	--	--	--	HMDB0251975	57-24-9	Organic compounds	Alkaloids and derivatives	Strychnos alkaloids	--	Animals
neg_3455	alpha-1,5-L-Arabinotriose	189.661	181.221	159.681	93.4198	112.542	125.413	21.666	56.9298	3.27526	-0.679063	0.00676231	1.05336	down	-2.01704	0.0167826	1.06502	down	-16.0944	C15H26O13	413.123	2.76645	--	--	--	--	--	--	--	--	--	--	--	--	--
neg_3518	N-Acetylbialaphos	39871	40102.8	41410.2	31374.5	30643.3	30150.5	26160.2	25797.7	26517	-0.397238	0.00014162	1.12191	down	-0.232037	0.00112813	1.14461	down	0.433542	C13H24N3O7P	386.11	2.80935	--	--	--	--	--	--	--	--	--	--	--	--	--
neg_3557	Doxycycline	2659.6	2661.02	1670.22	840.419	772.31	725.504	275.58	252.474	249.084	-1.58005	0.041194	1.03912	down	-1.58918	0.00261994	1.15306	down	18.8046	C22H24N2O8	479.131	2.83797	--	--	--	--	--	--	--	--	--	--	--	--	--
neg_3605	2,3-Pyridinedicarboxylic acid	511.395	526.384	485.935	448.146	420.023	439.002	324.173	324.195	368.731	-0.221144	0.0099012	1.04972	down	-0.361989	0.00955726	1.0977	down	1.28242	C7H5NO4	166.015	2.85942	C03722	Tryptophan metabolism(ko00380);;beta-Alanine metabolism(ko00410);;Nicotinate and nicotinamide metabolism(ko00760);;Biosynthesis of plant secondary metabolites(ko01060);;Biosynthesis of alkaloids derived from ornithine, lysine and nicotinic acid(ko01064);;Metabolic pathways(ko01100);;Biosynthesis of cofactors(ko01240)	--	--	--	--	HMDB0000232	89-00-9	Organic compounds	Organoheterocyclic compounds	Pyridines and derivatives	--	Microbe,Animals,Plants
neg_3613	(4Z,7Z,10Z,13Z,16Z,19Z)-Docosahexaenoyl-CoA	501.435	506.517	523.719	414.539	424.612	445.157	228.081	198.686	236.275	-0.254115	0.00247215	1.09028	down	-0.953818	0.000195947	1.15216	down	-19.4033	C43H66N7O17P3S	1098.3	2.87372	--	--	--	--	--	--	--	--	--	--	--	--	--
neg_3622	N-Glycolylneuraminic acid	1266.79	1265.41	1276.85	836.641	777.759	796.377	525.984	518.411	560.248	-0.659933	0.000926372	1.12701	down	-0.587245	0.000383537	1.14857	down	-19.1589	C11H19NO10	695.188	2.86655	--	--	--	--	--	--	HMDB0242723	--	Organic compounds	Organic oxygen compounds	Organooxygen compounds	--	Animals
neg_3628	Kaempferol 3-sophorotrioside	963.688	970.469	896.951	712.105	779.105	752.791	491.016	502.931	517.071	-0.335293	0.00339154	1.07891	down	-0.570552	0.00262655	1.14654	down	-13.698	C33H40O21	817.194	2.86655	--	--	--	--	--	--	--	--	--	--	--	--	--
neg_3671	13-Dihydrodaunorubicin	2806.72	2886.54	2915.64	2086.17	1990.02	1995.44	1324.47	1298.04	1406.31	-0.503745	4.82142e-05	1.12397	down	-0.591726	0.000113674	1.1532	down	-9.03381	C27H31NO10	564.159	2.89517	--	--	--	--	--	--	HMDB0244506	--	Organic compounds	Phenylpropanoids and polyketides	Anthracyclines	--	Animals
neg_3683	Luteolin 7-O-[beta-D-glucuronosyl-(1->2)-beta-D-glucuronide]-4'-O-beta-D-glucuronide	297.356	297.896	268.13	230.114	240.065	233.978	194.353	195.054	175.792	-0.294103	0.0250227	1.05421	down	-0.317139	0.008415	1.11405	down	5.25344	C33H34O24	859.146	2.9023	--	--	--	--	--	--	--	--	--	--	--	--	--
neg_3869	Rosiglitazone	690.676	726.345	627.542	573.661	549.495	563.81	386.473	376.916	403.13	-0.277361	0.047193	1.01157	down	-0.532221	7.94034e-05	1.15513	down	11.9567	C18H19N3O3S	773.252	2.99527	--	--	--	--	--	--	HMDB0005031	122320-73-4	Organic compounds	Benzenoids	Phenol ethers	--	Animals
neg_3969	Astragalin	447.521	461.672	452.142	353.873	374.932	354.118	142.123	126.793	135.342	-0.330092	0.000964033	1.11333	down	-1.42158	4.27273e-05	1.16006	down	7.83534	C21H20O11	447.097	3.0589	--	--	--	--	--	--	--	--	--	--	--	--	--
neg_4118	Penicillin G	1758.41	1739.53	1800.4	1112.44	1086.1	1100.65	752.416	749.336	812.818	-0.683427	0.00012446	1.12829	down	-0.511368	0.00155678	1.15302	down	-2.64138	C16H18N2O4S	667.188	3.1447	C05551	Bile secretion(ko04976)	--	--	--	--	HMDB0015186	61-33-6	Organic compounds	Organic acids and derivatives	Carboxylic acids and derivatives	--	Animals
neg_4124	2'-Deamino-2'-hydroxyparomamine	6224.28	6255.9	6419.91	2287.28	2180.51	2150.44	478.193	481.665	511.189	-1.51388	2.45877e-06	1.12952	down	-2.1696	0.000291116	1.16178	down	41.4099	C12H24N2O8	323.159	3.15185	--	--	--	--	--	--	--	--	--	--	--	--	--
neg_4167	7-Methylthioheptyl-desulfoglucosinolate	361.401	346.207	360.399	149.48	150.28	151.746	86.106	94.0661	93.7804	-1.2421	0.000463584	1.12887	down	-0.72082	0.00110851	1.15853	down	3.85089	C15H29NO6S2	404.12	3.16615	--	--	--	--	--	--	--	--	--	--	--	--	--
neg_4350	9alpha-Hydroxyandrosta-1,4-diene-3,17-dione	131	149.119	125.947	100.25	97.229	107.837	87.5708	78.3363	83.4	-0.411411	0.0262244	1.02738	down	-0.292381	0.0113709	1.06445	down	-9.65673	C19H24O3	335.139	3.2734	--	--	--	--	--	--	--	--	--	--	--	--	--
neg_4547	Vomilenine	994.93	873.373	1103.79	400.265	455.491	399.114	137.231	165.343	136.147	-1.24394	0.00912135	1.09853	down	-1.51616	0.00100295	1.14947	down	-14.2656	C21H22N2O3	349.151	3.39423	--	--	--	--	--	--	--	--	--	--	--	--	--
neg_4655	Liquiritigenin	2304.12	2312.85	2280.37	1735.47	1727.56	1727.9	688.681	661.867	638.215	-0.410043	0.000121638	1.12953	down	-1.38413	0.000122409	1.1628	down	-2.62287	C15H12O4	557.144	3.4443	--	--	--	--	--	--	--	--	--	--	--	--	--
neg_4746	Parthenin	251.53	254.611	237.379	123.594	152.645	146.775	86.5106	86.2953	72.7355	-0.813665	0.00131608	1.10955	down	-0.78474	0.00968729	1.10224	down	33.8431	C15H18O4	261.122	3.50863	--	--	--	--	--	--	--	--	--	--	--	--	--
neg_4969	100-1	2021.02	2049.03	2025.37	1447.18	1513.86	1554.35	1195.18	1168.29	1136.1	-0.432879	0.00197635	1.12171	down	-0.36767	0.00216038	1.13856	down	1.51741	C31H34O10	601.185	3.65878	--	--	--	--	--	--	--	--	--	--	--	--	--
neg_5066	3-beta-D-Galactosyl-sn-glycerol	244.053	226.941	310.749	81.6851	102.097	89.0237	9.71442	9.4958	6.79639	-1.51882	0.0177389	1.07964	down	-3.39092	0.0044139	1.15073	down	-0.665429	C9H18O8	299.098	3.74387	--	--	--	--	--	--	--	--	--	--	--	--	--
neg_5072	Manninotriose	268.592	254.293	294.906	198.587	199.567	188.729	89.3767	95.7397	87.0169	-0.47866	0.0168423	1.07582	down	-1.10876	3.16184e-05	1.15914	down	33.704	C18H32O16	525.161	3.73672	--	--	--	--	--	--	--	--	--	--	--	--	--
neg_5091	(卤)Abscisic Acid	558.217	513.852	585.346	182.315	148.627	163.446	75.2905	74.5512	88.6131	-1.74522	0.000626337	1.12232	down	-1.05193	0.00510157	1.12809	down	6.81619	C15H20O4	263.131	3.75102	--	--	--	--	--	--	--	--	--	--	--	--	--
neg_5092	Procaine	2859.47	2808.3	2941.12	950.526	892.278	891.934	608.839	627.872	671.462	-1.65443	2.73029e-05	1.12912	down	-0.51921	0.000517436	1.14171	down	-37.5589	C13H20N2O2	281.142	3.75102	C07375	--	--	--	--	--	HMDB0014859	59-46-1	Organic compounds	Benzenoids	Benzene and substituted derivatives	--	Animals
neg_5107	2'-O-methylinosine	426.138	407.411	452.42	190.613	226.848	237.291	129.153	153.621	149.226	-0.973835	0.000411481	1.11164	down	-0.599918	0.018261	1.06834	down	0.0572698	C11H14N4O5	327.133	3.75817	--	--	--	--	--	--	--	--	--	--	--	--	--
neg_5141	Cyanidin 3-O-sophoroside	2442.49	2422.15	2215.8	1962.72	1795.4	1856.49	667.648	673.418	651.371	-0.334656	0.00733232	1.06428	down	-1.49465	0.00138395	1.15943	down	11.8356	C27H31O16+	656.167	3.77247	--	--	--	--	--	--	--	--	--	--	--	--	--
neg_5189	Sophoraflavanone G	123.144	111.072	124.212	22.8824	41.3222	38.4697	11.9518	5.20978	7.63682	-1.80361	0.000445856	1.11464	down	-2.04976	0.0343051	1.05406	down	1.60362	C25H28O6	423.182	3.80107	--	--	LMPK12140467	Polyketides [PK]	Flavonoids [PK12]	Flavanones [PK1214]	HMDB0258381	--	Organic compounds	Phenylpropanoids and polyketides	Flavonoids	--	Animals
neg_5221	Valyl-Tyrosine	202.533	200.903	194.008	116.023	105.911	104.499	82.8881	79.0804	84.8874	-0.872017	7.25849e-05	1.12476	down	-0.403118	0.00831628	1.11338	down	-29.6662	C14H20N2O4	279.127	3.81537	--	--	--	--	--	--	--	--	--	--	--	--	--
neg_5227	cis-2,3-Dihydroxy-2,3-dihydro-p-cumate	676.307	660.261	664.892	534.061	526.075	523.19	409.405	420.047	418.399	-0.338095	4.78296e-05	1.12633	down	-0.343511	1.75902e-05	1.15922	down	3.08344	C10H14O4	441.178	3.81537	--	--	--	--	--	--	--	--	--	--	--	--	--
neg_5228	2,6-Dihydroxy-N-methylmyosmine	596.544	601.005	592.656	237.116	227.611	223.264	165.823	168.828	157.152	-1.37967	2.08867e-06	1.12987	down	-0.484307	0.000301493	1.14762	down	0.24355	C10H12N2O2	443.194	3.81537	--	--	--	--	--	--	--	--	--	--	--	--	--
neg_5263	Naringenin 7-O-beta-D-glucoside	49.1368	54.2984	57.4027	8.05575	9.0477	5.29052	2.59748	3.12046	1.60283e-07	-2.84442	0.000582698	1.12288	down	-1.96954	0.0207398	1.02554	down	-2.72248	C21H22O10	433.113	3.84397	--	--	--	--	--	--	--	--	--	--	--	--	--
neg_5294	Octanoyl-CoA	8561.5	8721.71	8328.33	4232.06	4058.58	4073.6	1867.59	1942.33	1873.27	-1.05062	6.9161e-05	1.1284	down	-1.1214	9.34742e-05	1.16153	down	36.8332	C29H50N7O17P3S	892.245	3.85827	C01944	--	--	--	--	--	HMDB0001070	1264-52-4	Organic compounds	Lipids and lipid-like molecules	Fatty Acyls	--	Animals
neg_5298	S-Methyl-L-cysteine	308.864	313.36	291.29	69.5749	72.6095	75.2908	44.5113	52.6065	55.8013	-2.07058	0.000453505	1.12821	down	-0.508082	0.0113354	1.09893	down	-5.83227	C4H9NO2S	134.027	3.87257	C22040	ABC transporters(ko02010)	--	--	--	--	HMDB0302211	--	Organic compounds	Organic acids and derivatives	Carboxylic acids and derivatives	--	Animals
neg_5438	Retinoate	7734.17	7663.96	7910.51	60.0875	70.6024	73.4907	32.3144	19.7698	32.8764	-6.83487	8.65728e-05	1.13002	down	-1.26498	0.00256448	1.11528	down	-18.5888	C20H28O2	335.173	3.94407	--	--	--	--	--	--	HMDB0244343	--	Organic compounds	Lipids and lipid-like molecules	Prenol lipids	--	Animals
neg_5556	Azelaic acid	28432.5	27580.1	22686.3	2643.42	2572.33	2544.75	2052.12	2039.25	2126.6	-3.34212	0.00567329	1.11744	down	-0.319703	0.000220037	1.14931	down	6.07644	C9H16O4	187.099	4.01557	C08261	--	LMFA01170054	Fatty Acyls [FA]	Fatty Acids and Conjugates [FA01]	Dicarboxylic acids [FA0117]	HMDB0000784	123-99-9	Organic compounds	Lipids and lipid-like molecules	Fatty Acyls	--	Animals,Plants
neg_5557	L-Methionine	70.7459	72.5373	71.5535	48.8413	44.6086	47.6076	25.0304	29.3801	28.624	-0.606956	0.000734047	1.12347	down	-0.764502	0.000471974	1.14297	down	0.617201	C5H11NO2S	194.049	4.01557	C01733	--	--	--	--	--	HMDB0033951	59-51-8	Organic compounds	Organic acids and derivatives	Carboxylic acids and derivatives	--	Animals
neg_5592	Agroclavine	180.068	173.879	132.797	65.2855	66.6842	56.6401	39.1617	52.0239	42.7525	-1.36776	0.0180269	1.08096	down	-0.493838	0.0226873	1.02114	down	-0.00649341	C16H18N2	259.122	4.037	--	--	--	--	--	--	--	--	--	--	--	--	--
neg_5670	Secologanin	110.15	89.2842	123.269	26.2964	32.9729	34.3014	13.4193	13.477	9.04387	-1.78608	0.012398	1.09176	down	-1.38046	0.00531195	1.1144	down	-42.9455	C17H24O10	433.118	4.08633	--	--	--	--	--	--	--	--	--	--	--	--	--
neg_5771	Neomycin B	7838.44	7933.5	7892.48	1587.09	1519.65	1538.79	1283.02	1251.31	1301.62	-2.3488	2.08563e-08	1.13017	down	-0.276263	0.000644261	1.14408	down	27.689	C23H46N6O13	659.327	4.15068	--	--	--	--	--	--	--	--	--	--	--	--	--
neg_5782	Dihydrophaseic acid	2677.42	2740.99	2675.97	819.903	723.52	730.179	467.116	475.507	471.694	-1.83194	3.13758e-06	1.12941	down	-0.684874	0.0111982	1.13659	down	6.69345	C15H22O5	281.141	4.15783	C15971	Carotenoid biosynthesis(ko00906)	LMPR0103050005	Prenol Lipids [PR]	Isoprenoids [PR01]	C15 isoprenoids (sesquiterpenes) [PR0103]	HMDB0038660	41756-77-8	Organic compounds	Lipids and lipid-like molecules	Prenol lipids	--	Animals,Plants
neg_5790	Verruculogen	749.268	753.165	758.212	676.713	622.676	627.104	364.174	366.069	384.466	-0.230757	0.0213783	1.07839	down	-0.78931	0.00158683	1.15254	down	9.86531	C27H33N3O7	556.235	4.16498	C20045	Staurosporine biosynthesis(ko00404);;Metabolic pathways(ko01100);;Biosynthesis of secondary metabolites(ko01110)	--	--	--	--	--	--	--	--	--	--	--
neg_5812	Dexamethasone	5493.3	5491.38	5564.45	695.468	658.575	671.994	579.111	572.49	544.63	-3.03002	9.50046e-07	1.13016	down	-0.256327	0.00189173	1.12175	down	16.3689	C22H29FO5	391.199	4.17928	C15643	--	--	--	--	--	HMDB0015364	1950-02-02	Organic compounds	Lipids and lipid-like molecules	Steroids and steroid derivatives	--	Animals
neg_5823	13(S)-HPOT	612.417	615.388	631.859	534.155	530.483	517.459	280.76	276.658	279.744	-0.233204	0.000357548	1.11424	down	-0.91826	0.000208118	1.16215	down	15.5992	C18H30O4	331.194	4.19358	C04785	alpha-Linolenic acid metabolism(ko00592);;Metabolic pathways(ko01100);;Biosynthesis of secondary metabolites(ko01110)	LMFA02000052	Fatty Acyls [FA]	Octadecanoids [FA02]	Other Octadecanoids [FA0200]	HMDB0301803	67597-26-6	Organic compounds	Lipids and lipid-like molecules	Fatty Acyls	--	Animals
neg_5827	Threoninyl-Tryptophan	33796.8	33779.5	34566.2	29431.1	28917.3	28853.1	16774.5	16792.3	17210.6	-0.228162	0.000193093	1.12122	down	-0.780161	1.52975e-06	1.1624	down	-21.0509	C15H19N3O4	669.276	4.19358	--	--	--	--	--	--	HMDB0304790	--	Organic compounds	Organic acids and derivatives	Carboxylic acids and derivatives	--	Animals
neg_6013	N-Phenylacetylphenylalanine	96772.5	96134.5	99295.7	2561.52	2544.9	2537.85	1484.36	1509.02	1508.85	-5.25645	0.000103437	1.12999	down	-0.763738	9.30243e-08	1.163	down	5.72128	C17H17NO3	282.115	4.32228	--	--	--	--	--	--	HMDB0002372	738-75-0	Organic compounds	Organic acids and derivatives	Carboxylic acids and derivatives	--	Animals
neg_6029	Matairesinol	300.94	300.204	320.435	139.88	140.273	139.404	56.0615	65.984	65.9084	-1.13524	0.00154262	1.1267	down	-1.15849	0.00172413	1.15901	down	17.2591	C20H22O6	357.141	4.32942	C10682	Biosynthesis of various plant secondary metabolites(ko00999);;Biosynthesis of phenylpropanoids(ko01061);;Metabolic pathways(ko01100);;Biosynthesis of secondary metabolites(ko01110)	--	--	--	--	HMDB0035698	580-72-3	Organic compounds	Lignans, neolignans and related compounds	Furanoid lignans	--	Animals
neg_6203	Indoxyl	165.863	167.586	169.496	27.5383	25.6869	27.7137	19.0921	21.7112	22.6627	-2.63549	4.19837e-07	1.13006	down	-0.350847	0.0150352	1.06955	down	17.2565	C8H7NO	178.053	4.47887	C05658	Tryptophan metabolism(ko00380)	--	--	--	--	HMDB0004094	480-93-3	Organic compounds	Organoheterocyclic compounds	Indoles and derivatives	--	Animals
neg_6207	N6-(L-1,3-Dicarboxypropyl)-L-lysine	979.534	995.179	990.908	204.518	201.958	198.923	122.938	99.7527	99.0975	-2.29238	5.04894e-06	1.13015	down	-0.911773	0.00522468	1.14686	down	-15.8019	C11H20N2O6	297.102	4.47887	C00449	Lysine biosynthesis(ko00300);;Lysine degradation(ko00310);;Metabolic pathways(ko01100);;Biosynthesis of secondary metabolites(ko01110);;Biosynthesis of amino acids(ko01230)	--	--	--	--	HMDB0000279	997-68-2	Organic compounds	Organic acids and derivatives	Carboxylic acids and derivatives	--	Microbe,Animals
neg_632	sn-Glycerol 3-phosphate	297.742	286.004	313.669	112.941	116.323	130.476	92.3373	92.0762	87.4037	-1.31882	0.00012846	1.12367	down	-0.404316	0.0242783	1.08716	down	3.97875	C3H9O6P	171.007	0.605133	C00093	Glycerolipid metabolism(ko00561);;Glycerophospholipid metabolism(ko00564);;Metabolic pathways(ko01100);;Biosynthesis of secondary metabolites(ko01110);;ABC transporters(ko02010);;Choline metabolism in cancer(ko05231)	--	--	--	--	HMDB0000126	1957-03-04	Organic compounds	Lipids and lipid-like molecules	Glycerophospholipids	--	Microbe,Animals
neg_6371	Sebacic acid	11004.5	10731.6	6035.11	282.802	248.954	254.057	121.752	123.949	142.483	-5.14326	0.0306751	1.06382	down	-1.01744	0.00105529	1.14339	down	9.02323	C10H18O4	201.115	4.62187	C08277	--	LMFA01170006	Fatty Acyls [FA]	Fatty Acids and Conjugates [FA01]	Dicarboxylic acids [FA0117]	HMDB0000792	111-20-6	Organic compounds	Lipids and lipid-like molecules	Fatty Acyls	--	Animals,Plants
neg_6447	Olmesartan	1908.49	1895.5	1772.68	1683.58	1601.62	1683.1	1209.3	1165.25	1205.54	-0.166649	0.0230497	1.00916	down	-0.472756	0.000632455	1.15341	down	21.4544	C30H32N6O6	617.247	4.68622	--	--	--	--	--	--	--	--	--	--	--	--	--
neg_6503	Rubusoside	1859.24	1823.12	1874.53	814.406	763.731	825.105	355.988	366.265	342.808	-1.20929	2.73159e-06	1.12901	down	-1.17405	0.000609084	1.15872	down	0.812071	C32H50O13	641.318	4.77132	--	--	--	--	--	--	--	--	--	--	--	--	--
neg_6527	Bruceantin	1264.42	1234.02	1254.43	143.029	150.406	143.084	43.8927	66.7033	61.3203	-3.10388	2.08135e-05	1.13005	down	-1.34434	0.00280195	1.14751	down	21.6308	C28H36O11	593.236	4.78562	--	--	--	--	--	--	--	--	--	--	--	--	--
neg_6545	27-O-Demethylrifamycin SV	1235.01	1243.87	1390.25	588.538	568.291	600.777	187.431	193.836	181.008	-1.13839	0.00398523	1.11847	down	-1.64426	0.000113131	1.16185	down	-0.928686	C36H45NO12	718.263	4.80707	--	--	--	--	--	--	--	--	--	--	--	--	--
neg_6580	Val Ala His Glu	1418.56	1407.41	1414.78	1152.46	1051.52	1116.79	609.928	594.952	594.282	-0.352796	0.00853397	1.10962	down	-0.884197	0.00268728	1.15535	down	-13.517	C19H30N6O7	453.204	4.84995	--	--	--	--	--	--	--	--	--	--	--	--	--
neg_6581	Hydrocortisone succinate	340.028	356.329	350.609	249.631	234.197	249.216	176.899	202.922	165.159	-0.514243	0.000117521	1.12046	down	-0.427695	0.0171769	1.08349	down	2.28893	C25H34O8	497.196	4.84995	C12888	--	LMST02030126	Sterol Lipids [ST]	Steroids [ST02]	C21 steroids (gluco/mineralocorticoids, progestogins) and derivatives [ST0203]	--	--	--	--	--	--	--
neg_6640	Crocin II	217.089	253.674	236.437	150.091	155.707	181.33	71.174	81.8996	48.9606	-0.53782	0.0069801	1.05334	down	-1.2697	0.0022425	1.11831	down	4.69373	C38H54O19	835.304	4.90717	--	--	--	--	--	--	--	--	--	--	--	--	--
neg_6745	Ser Asp Arg Asp	349.307	397.873	339.164	239.733	212.026	231.627	137.79	147.501	144.133	-0.668707	0.00831315	1.08393	down	-0.670299	0.00495475	1.13967	down	0.390098	C17H29N7O10	490.191	5.043	--	--	--	--	--	--	--	--	--	--	--	--	--
neg_6757	2'''-N-Acetyl-6'''-deamino-6'''-hydroxyparomomycin II	190.517	212.201	182.706	67.9414	38.875	55.8892	5.91821	9.55934	1.60283e-07	-1.84722	0.000325042	1.11379	down	-3.39401	0.0198541	1.09413	down	9.50993	C25H46N4O16	703.295	5.06373	--	--	--	--	--	--	--	--	--	--	--	--	--
neg_6768	Urdamycin A	1859.2	1833.19	2001.89	940.346	973.854	1019.11	796.482	871.675	875.507	-0.956985	0.000871164	1.12157	down	-0.205621	0.0199969	1.02858	down	-15.4696	C43H56O17	889.337	5.07088	--	--	--	--	--	--	--	--	--	--	--	--	--
neg_6771	Syrosingopine	695.699	707.827	838.103	350.091	494.729	505.002	281.652	288.371	218.782	-0.731777	0.01198	1.02849	down	-0.775029	0.0476214	1.00422	down	-3.54024	C35H42N2O11	687.251	5.07803	--	--	--	--	--	--	HMDB0258655	84-36-6	Organic compounds	Alkaloids and derivatives	Yohimbine alkaloids	--	Animals
neg_6796	Pelargonidin	5156.09	5148.68	5288.78	1006.51	928.38	927.675	731.581	726.642	744.393	-2.44557	2.1509e-06	1.12989	down	-0.378088	0.0113577	1.13038	down	2.01251	C15H10O5	269.046	5.12095	--	--	--	--	--	--	--	--	--	--	--	--	--
neg_6805	Dronabinol	548.332	551.193	554.633	132.994	123.575	123.997	80.8569	85.7694	79.2059	-2.11988	4.98627e-07	1.13008	down	-0.630472	0.000606676	1.14811	down	-13.3348	C21H30O2	349.19	5.12808	C06972	Biosynthesis of various plant secondary metabolites(ko00999);;Metabolic pathways(ko01100);;Biosynthesis of secondary metabolites(ko01110)	LMPK13120004	Polyketides [PK]	Aromatic polyketides [PK13]	Other aromatic polyketides [PK1312]	HMDB0014613	1972-08-03	Organic compounds	Organoheterocyclic compounds	Benzopyrans	--	Animals
neg_6822	12-Keto-leukotriene B4	202.962	204.243	215.721	163.775	169.205	175.954	14.5475	11.9784	17.5008	-0.291581	0.00226877	1.08751	down	-3.53103	6.20987e-05	1.1619	down	8.73758	C20H30O4	333.21	5.14953	C05949	Arachidonic acid metabolism(ko00590)	LMFA03020024	Fatty Acyls [FA]	Eicosanoids [FA03]	Leukotrienes [FA0302]	HMDB0004234	136696-10-1	Organic compounds	Lipids and lipid-like molecules	Fatty Acyls	--	Animals
neg_6909	3-Hydroxyethylchlorophyllide a	2476.55	2528.46	2548.02	851.879	878.322	920.796	439.679	400.689	407.589	-1.51052	6.44982e-07	1.12951	down	-1.08697	0.000156657	1.15763	down	14.0013	C35H36MgN4O6	677.256	5.25678	--	--	--	--	--	--	--	--	--	--	--	--	--
neg_6917	SB 431542	14113	14229.5	14814.2	1081.48	990.782	1006.54	641.396	644.659	629.396	-3.80914	0.000213013	1.12963	down	-0.684686	0.00428073	1.151	down	0.220262	C22H16N4O3	383.115	5.27108	--	--	--	--	--	--	--	--	--	--	--	--	--
neg_6967	8-iso-15-keto-PGE2	62.034	48.5781	59.4826	21.3569	21.4182	18.5449	1.60283e-07	1.30929	1.60283e-07	-1.47191	0.00977697	1.10041	down	-5.5495	0.000457686	1.15675	down	8.02852	C20H30O5	349.205	5.33543	--	--	--	--	--	--	HMDB0002341	914804-63-0	Organic compounds	Lipids and lipid-like molecules	Fatty Acyls	--	Animals
neg_6995	Neopentalenolactone D	83.0501	92.8914	92.0166	55.1988	47.7317	50.9645	17.2821	17.7691	20.1878	-0.800062	0.00102198	1.10836	down	-1.47819	0.00140456	1.15175	down	12.9558	C15H20O4	263.132	5.37833	--	--	--	--	--	--	--	--	--	--	--	--	--
neg_7000	Podophyllotoxin (Podophyllum)	72025.6	73457.5	74197	14586	14339.1	14345	10281.9	10203.6	10260.1	-2.34396	9.28965e-05	1.12998	down	-0.492984	0.000144232	1.16229	down	1.36792	C22H22O8	413.125	5.39192	--	--	--	--	--	--	--	--	--	--	--	--	--
neg_7006	Nocardicin E	397.24	388.908	448.104	53.9252	49.1566	52.9289	39.234	39.1997	45.088	-2.98392	0.00250826	1.12425	down	-0.33688	0.0135421	1.06129	down	11.5865	C19H17N3O7	398.104	5.39905	--	--	--	--	--	--	--	--	--	--	--	--	--
neg_7022	4-Gingerol	1812.25	1812.05	1898.62	1727.8	1606.45	1669.92	1279.84	1234.32	1276.45	-0.142301	0.0202379	1.00102	down	-0.4007	0.00287917	1.14346	down	7.86382	C15H22O4	265.147	5.4205	--	--	--	--	--	--	--	--	--	--	--	--	--
neg_7042	6'-Dehydro-6'-oxoparomamine	610.541	612.736	658.355	326.259	348.858	335	202.238	190.024	174.915	-0.897461	0.000792304	1.12263	down	-0.832652	0.000167684	1.152	down	25.2449	C12H23N3O7	641.316	5.4348	--	--	--	--	--	--	--	--	--	--	--	--	--
neg_7067	Monacolin J acid	204.55	203.338	173.028	78.3198	70.597	75.8429	42.3918	49.4107	40.1173	-1.36995	0.00556339	1.11274	down	-0.768722	0.00121021	1.13301	down	-2.45114	C19H30O5	373.178	5.4491	--	--	--	--	--	--	--	--	--	--	--	--	--
neg_7080	Narirutin	758.446	715.44	721.325	31.9506	27.4816	25.5739	12.7498	13.7936	12.5627	-4.69065	0.000288271	1.12934	down	-1.12018	0.0122916	1.12771	down	8.79738	C27H32O14	579.177	5.45625	--	--	--	--	--	--	--	--	--	--	--	--	--
neg_7116	4a-Hydroxytetrahydrobiopterin	459.967	451.24	461.865	250.276	269.511	246.642	139.64	122.736	143.824	-0.841183	0.00019668	1.12683	down	-0.915964	0.000246474	1.14851	down	9.95557	C9H15N5O4	559.228	5.51345	C15522	Folate biosynthesis(ko00790);;Metabolic pathways(ko01100)	--	--	--	--	HMDB0002281	1379003-93-6	Organic compounds	Organoheterocyclic compounds	Pteridines and derivatives	--	Animals
neg_7131	Cornuside	553.767	460.707	355.768	10.7463	9.06475	13.0709	1.60283e-07	1.60283e-07	1.60283e-07	-5.38099	0.0160326	1.09459	down	-26.0271	0.0110428	1.13849	down	2.82123	C24H30O14	587.163	5.5206	--	--	--	--	--	--	--	--	--	--	--	--	--
neg_7140	1-methylguanosine	1829.12	1655.03	1915.23	67.2786	77.0758	62.2944	35.0758	9.36784	14.8805	-4.70754	0.00189438	1.12576	down	-1.80049	0.0106328	1.0927	down	43.0042	C11H15N5O5	593.233	5.52775	--	--	--	--	--	--	--	--	--	--	--	--	--
neg_7146	Aerobactin	31344	30458.7	31569.8	1250.06	1077.97	1185.83	499.657	437.5	502.417	-4.73187	9.38031e-05	1.12991	down	-1.28742	0.00177507	1.14926	down	-2.19977	C22H36N4O13	563.219	5.54205	C05554	Biosynthesis of various other secondary metabolites(ko00997);;Metabolic pathways(ko01100);;Biosynthesis of secondary metabolites(ko01110);;Microbial metabolism in diverse environments(ko01120)	--	--	--	--	HMDB0004051	26198-65-2	Organic compounds	Organic acids and derivatives	Carboxylic acids and derivatives	--	Microbe,Animals
neg_7170	Taxa-4(20),11(12)-dien-5alpha-acetoxy-10beta-ol	101.288	94.6762	100.367	32.2965	33.28	21.6706	7.87896	10.511	14.7388	-1.76403	0.000387433	1.12188	down	-1.39702	0.02248	1.05285	down	-35.7544	C22H34O3	367.213	5.57065	C11898	Diterpenoid biosynthesis(ko00904);;Biosynthesis of secondary metabolites(ko01110)	LMPR0104390006	Prenol Lipids [PR]	Isoprenoids [PR01]	C20 isoprenoids (diterpenes) [PR0104]	--	--	--	--	--	--	--
neg_7179	Dodecanedioic acid	1381.82	1349.82	1748.05	675.742	574.999	592.789	347.959	356.711	404.329	-1.28093	0.0161461	1.08285	down	-0.733213	0.00535782	1.11694	down	9.55438	C12H22O4	229.147	5.58495	--	--	--	--	--	--	--	--	--	--	--	--	--
neg_7189	9,12,13-TriHOME	287417	282163	368053	159740	140327	138384	88793	86788	104310	-1.0966	0.0216642	1.06883	down	-0.647553	0.00438005	1.10383	down	3.30926	C18H34O5	329.234	5.5778	C14833	Linoleic acid metabolism(ko00591)	LMFA02000014	Fatty Acyls [FA]	Octadecanoids [FA02]	Other Octadecanoids [FA0200]	HMDB0004708	--	Organic compounds	Lipids and lipid-like molecules	Fatty Acyls	--	Animals
neg_724	4,5-Dioxopentanoate	894.022	868.127	913.912	563.785	573.002	562.774	449.427	463.06	447.482	-0.654949	0.000965572	1.12623	down	-0.321587	0.000117689	1.15688	down	16.6367	C5H6O4	129.021	0.619433	C02800	Porphyrin metabolism(ko00860)	--	--	--	--	HMDB0013233	--	Organic compounds	Organic acids and derivatives	Keto acids and derivatives	--	Animals
neg_7339	Pulsatilla saponin D	122.373	132.476	141.32	54.1169	40.1304	33.8704	16.4149	11.7792	1.60283e-07	-1.62864	0.000402587	1.11222	down	-2.18401	0.0136488	1.05478	down	-0.709269	C47H76O17	957.506	5.75583	--	--	--	--	--	--	--	--	--	--	--	--	--
neg_7356	Bis(glutathionyl)spermine disulfide	451.474	440.552	379.879	295.034	344.127	322.095	217.662	214.277	168.202	-0.403998	0.0234981	1.00656	down	-0.679619	0.00507429	1.09603	down	-7.91062	C30H54N10O10S2	777.333	5.77728	--	--	--	--	--	--	--	--	--	--	--	--	--
neg_7377	Flaconitine	679.706	713.624	757.349	245.964	354.99	342.557	185.428	174.403	75.2117	-1.18868	0.00124857	1.10727	down	-1.11688	0.0261011	1.00618	down	26.2918	C36H49NO12	732.342	5.8059	--	--	--	--	--	--	--	--	--	--	--	--	--
neg_7390	Glycylproline	192.111	198.394	184.126	50.8699	57.1268	52.9511	15.4403	9.45932	10.5971	-1.83604	0.00014072	1.12782	down	-2.18084	8.7066e-05	1.15428	down	2.61591	C7H12N2O3	389.169	5.82733	--	--	--	--	--	--	HMDB0000721	704-15-4	Organic compounds	Organic acids and derivatives	Carboxylic acids and derivatives	--	Animals
neg_7398	(卤)-14,15-DiHETE	299.568	299.347	297.43	181.397	181.791	175.727	106.581	110.063	99.3573	-0.733996	6.25679e-05	1.12955	down	-0.770131	0.000134103	1.15734	down	8.93267	C20H32O4	335.226	5.84163	--	--	--	--	--	--	--	--	--	--	--	--	--
neg_7434	Protodioscin	482.404	459.346	474.326	13.5601	7.55718	14.4475	1.31517	1.98065	2.70852	-5.31531	5.82782e-05	1.12966	down	-2.56637	0.04101	1.06291	down	-12.4498	C51H84O22	1069.51	5.89883	C08907	--	--	--	--	--	HMDB0034062	55056-80-9	Organic compounds	Lipids and lipid-like molecules	Steroids and steroid derivatives	--	Animals
neg_7493	Pisatin	2505.32	2463.83	2482.32	1064.67	1054.9	1031.01	709.519	684.292	676.428	-1.2419	1.30566e-07	1.12995	down	-0.605824	1.40691e-05	1.15958	down	2.08103	C17H14O6	313.072	5.99178	--	--	--	--	--	--	HMDB0033732	469-01-2	Organic compounds	Phenylpropanoids and polyketides	Isoflavonoids	--	Animals
neg_7561	Cimicifugoside H1	780.247	768.996	914.874	195.606	231.719	266.483	31.8709	35.7217	54.6949	-1.82846	0.00212259	1.11359	down	-2.50426	0.00634116	1.13469	down	-7.82681	C35H52O9	637.331	6.07688	--	--	--	--	--	--	--	--	--	--	--	--	--
neg_7608	L-Olivosyl-oleandolide	188.357	197.108	170.451	26.166	46.5417	42.7998	12.4984	8.98651	20.6793	-2.26688	0.000172565	1.11977	down	-1.45389	0.0395355	1.00399	down	-11.3899	C26H44O10	515.28	6.16982	C11991	Biosynthesis of 12-, 14- and 16-membered macrolides(ko00522);;Metabolic pathways(ko01100);;Biosynthesis of secondary metabolites(ko01110)	LMPK04000032	Polyketides [PK]	Macrolides and lactone polyketides [PK04]	-	--	--	--	--	--	--	--
neg_7648	Pentalenate	113.273	113.626	91.8884	30.9464	22.4803	18.0462	2.75666	6.88072	10.816	-2.15713	0.0019539	1.10894	down	-1.80506	0.0261636	1.03064	down	8.33478	C15H22O3	249.152	6.22703	--	--	--	--	--	--	--	--	--	--	--	--	--
neg_7654	Ile-Ala-Arg	616.292	570.831	446.939	161.674	145.445	155.983	22.4848	35.2168	35.7297	-1.81906	0.0157372	1.09365	down	-2.30935	4.66289e-05	1.15707	down	6.969	C15H30N6O4	357.228	6.23418	--	--	--	--	--	--	--	--	--	--	--	--	--
neg_7683	D-Urobilinogen	377.446	373.637	313.513	240.256	233.174	231.717	102.499	105.62	105.25	-0.594311	0.0269764	1.06727	down	-1.17006	8.50563e-05	1.16215	down	3.27742	C33H42N4O6	611.287	6.26993	C05791	Porphyrin metabolism(ko00860);;Metabolic pathways(ko01100);;Biosynthesis of secondary metabolites(ko01110)	--	--	--	--	HMDB0004158	17208-65-0	Organic compounds	Organoheterocyclic compounds	Tetrapyrroles and derivatives	--	Animals
neg_7711	Lipid X	6734.97	6801.42	7586.73	25.114	20.9626	28.5227	4.0457	4.11383	2.6361	-8.14545	0.00151538	1.12682	down	-2.78871	0.00801275	1.13877	down	-32.3154	C34H66NO12P	732.384	6.30568	C04824	Lipopolysaccharide biosynthesis(ko00540);;Metabolic pathways(ko01100)	LMSL01020001	Saccharolipids [SL]	Acylaminosugars [SL01]	Diacylaminosugars [SL0102]	--	--	--	--	--	--	--
neg_7716	N6-Hydroxy-L-lysine	653.735	668.42	821.698	387.163	355.485	351.639	138.423	147.673	157.089	-0.970216	0.0191858	1.07852	down	-1.30401	0.000533976	1.15559	down	-11.7271	C6H14N2O3	323.19	6.33428	--	--	--	--	--	--	--	--	--	--	--	--	--
neg_7792	2-Hydroxy-6-oxo-(2'-aminophenyl)-hexa-2,4-dienoate	132.336	129.014	139.01	91.1317	80.7295	84.8992	41.0833	40.0514	42.5651	-0.640873	0.000344604	1.11313	down	-1.05358	0.00308238	1.15208	down	3.19361	C12H11NO4	268.039	6.47655	--	--	--	--	--	--	--	--	--	--	--	--	--
neg_7804	2,3-Dinor-8-iso prostaglandin F2alpha	5391.27	5530.53	6502.61	826.248	684.536	738.533	370.263	344.28	386.533	-2.95355	0.00429691	1.11948	down	-1.03057	0.00733194	1.13499	down	6.41341	C18H30O5	325.204	6.51947	--	--	--	--	--	--	--	--	--	--	--	--	--
neg_7830	1,11-Undecanedicarboxylic acid	76.7043	75.5584	90.0724	7.16957	10.696	13.1791	1.60283e-07	3.77325	1.60283e-07	-2.96459	0.00171892	1.11909	down	-3.04046	0.0163405	1.05195	down	17.7428	C13H24O4	243.165	6.57667	--	--	LMFA01170014	Fatty Acyls [FA]	Fatty Acids and Conjugates [FA01]	Dicarboxylic acids [FA0117]	HMDB0002327	505-52-2	Organic compounds	Lipids and lipid-like molecules	Fatty Acyls	--	Animals
neg_784	3.alpha.-Mannobiose	224548	215642	247479	148212	142285	153364	127256	125837	122125	-0.631605	0.00789716	1.09738	down	-0.242384	0.0086527	1.11166	down	5.24064	C12H22O11	341.111	0.648033	--	--	--	--	--	--	--	--	--	--	--	--	--
neg_7863	trans-2-Octenal	586.835	583.374	439.931	78.1344	54.5833	70.7767	5.4378	8.92599	7.95423	-2.98412	0.00936788	1.1064	down	-3.18871	0.0116233	1.13322	down	3.15097	C8H14O	297.208	6.6553	C21138	Prodigiosin biosynthesis(ko00333);;Metabolic pathways(ko01100);;Biosynthesis of secondary metabolites(ko01110)	LMFA06000029	Fatty Acyls [FA]	Fatty aldehydes [FA06]	-	HMDB0302984	2548-87-0	Organic compounds	Organic oxygen compounds	Organooxygen compounds	--	Animals,Plants,Microbe
neg_7864	KOPARIN 2'-METHYL ETHER	1794.31	1771.53	1754.22	1312.82	1212.2	1192.75	734.099	704.925	706.716	-0.517008	0.00252356	1.11844	down	-0.792962	0.00324495	1.15086	down	6.14252	C17H14O6	313.074	6.6553	--	--	--	--	--	--	--	--	--	--	--	--	--
neg_7881	12,13-DHOME	2392.65	2521.9	3264.49	328.554	420.309	392.341	220.698	215.172	92.7057	-2.84137	0.0124946	1.10085	down	-1.11037	0.0201965	1.04521	down	6.85511	C18H34O4	359.246	6.69822	C14829	--	LMFA02000302	Fatty Acyls [FA]	Octadecanoids [FA02]	Other Octadecanoids [FA0200]	HMDB0004705	7293-40-5	Organic compounds	Lipids and lipid-like molecules	Fatty Acyls	--	Animals
neg_7895	Withaferin A	1752.25	1709.45	1564.3	1179.45	1215.57	1279.87	687.075	663.259	624.974	-0.45171	0.00592673	1.087	down	-0.895623	0.000266935	1.1549	down	-23.7722	C28H38O6	469.248	6.73325	--	--	--	--	--	--	--	--	--	--	--	--	--
neg_7901	Cholic acid (sodium)	620.99	636.457	642.746	417.028	381.791	393.608	215.43	248.628	229.193	-0.672244	0.00014791	1.12432	down	-0.782453	0.000307323	1.14684	down	-10.6231	C24H39NaO5	451.24	6.74038	--	--	--	--	--	--	--	--	--	--	--	--	--
neg_7947	(4S)-7-Hydroxy-4-isopropenyl-7-methyl-2-oxo-oxepanone	1185.15	1279.6	1334.76	209.33	200.35	198.342	1.60283e-07	1.91043	1.60283e-07	-2.64362	0.00159238	1.12648	down	-8.31408	0.000178606	1.16256	down	9.61923	C10H16O3	427.237	6.8405	--	--	--	--	--	--	--	--	--	--	--	--	--
neg_8046	Marrubiin	2938.58	2967.66	2477.31	53.309	39.5979	42.7992	13.1222	2.33872	18.0799	-5.949	0.00330306	1.12275	down	-2.0165	0.00563844	1.09269	down	16.7913	C20H28O4	377.203	7.07573	--	--	--	--	--	--	--	--	--	--	--	--	--
neg_8074	Quadrone	424.385	421.876	440.823	146.727	142.899	139.706	37.5081	33.5424	32.8792	-1.58394	0.000115791	1.12915	down	-2.04649	4.76758e-06	1.16198	down	10.5742	C15H20O3	247.137	7.14007	--	--	--	--	--	--	--	--	--	--	--	--	--
neg_8121	Gibberellin A53 aldehyde	3929.39	4006.96	3402.51	184.564	116.248	123.897	41.1954	43.4636	71.6574	-4.73866	0.00244067	1.12405	down	-1.442	0.0370124	1.02765	down	16.8987	C20H28O4	377.203	7.22587	C11905	Diterpenoid biosynthesis(ko00904)	LMPR0104170029	Prenol Lipids [PR]	Isoprenoids [PR01]	C20 isoprenoids (diterpenes) [PR0104]	--	--	--	--	--	--	--
neg_814	Staphyloferrin B	6239.26	5931.14	7378.14	1154.56	1081.4	1279.95	720.32	801.739	722.327	-2.47509	0.00601124	1.11493	down	-0.647578	0.00844947	1.11436	down	2.72459	C16H24N4O11	447.138	0.662333	--	--	--	--	--	--	--	--	--	--	--	--	--
neg_8153	(卤)12,13-DiHOME	71820.6	72251	88943.6	20722.6	20233.3	20219.3	15060.6	15068.9	14668.7	-1.9294	0.0095003	1.10896	down	-0.44951	2.02614e-05	1.15973	down	1.83899	C18H34O4	313.239	7.28307	--	--	--	--	--	--	--	--	--	--	--	--	--
neg_8167	Veatchine	681.081	640.955	502.604	73.9969	72.4316	65.7108	1.60283e-07	1.97877	1.60283e-07	-3.10453	0.00984127	1.10792	down	-6.74426	0.000699726	1.15985	down	-28.5862	C22H33NO2	364.216	7.29737	--	--	--	--	--	--	--	--	--	--	--	--	--
neg_8194	(3R)-6-Hydroxy-3-isopropenyl-heptanoate	105.51	105.678	180.521	22.8618	21.5096	22.5173	4.88568	5.69086	6.73433	-2.54995	0.0492729	1.02631	down	-1.95009	2.90035e-05	1.15953	down	12.8395	C10H18O3	185.121	7.37603	--	--	--	--	--	--	--	--	--	--	--	--	--
neg_8195	cis-9-Palmitoleic acid	178.151	180.605	185.914	66.7626	69.765	66.975	36.2133	30.6601	27.4895	-1.42033	5.72057e-05	1.12916	down	-1.10876	0.00194491	1.15028	down	17.399	C16H30O2	275.204	7.37603	C08362	Fatty acid biosynthesis(ko00061);;Metabolic pathways(ko01100)	LMFA01030056	Fatty Acyls [FA]	Fatty Acids and Conjugates [FA01]	Unsaturated fatty acids [FA0103]	HMDB0003229	373-49-9	Organic compounds	Lipids and lipid-like molecules	Fatty Acyls	--	Microbe,Animals,Plants
neg_8201	Prostaglandin A2	1154.08	1138.4	1088.14	657.213	672.118	633.181	323.348	313.772	305.262	-0.784582	0.000171244	1.12494	down	-1.05832	0.000171278	1.15997	down	5.15022	C20H30O4	379.214	7.37603	--	--	--	--	--	--	HMDB0302203	13345-50-1	Organic compounds	Lipids and lipid-like molecules	Fatty Acyls	--	Animals
neg_8233	9-cis-10'-Apo-beta-carotenal	658.425	663.148	683.842	72.6513	73.0437	74.7872	58.4123	60.898	65.7701	-3.18517	0.000156168	1.12984	down	-0.252511	0.0240237	1.08673	down	37.0684	C27H36O	397.265	7.45397	--	--	--	--	--	--	--	--	--	--	--	--	--
neg_8234	1,3,5,7,9,11,13-Pentadecaheptaene	6191.08	6197.97	6367.32	41.9577	38.0124	57.6611	15.6625	13.2519	11.1643	-7.09043	7.32331e-05	1.13003	down	-1.7799	0.0278537	1.08905	down	-36.4645	C15H18	441.265	7.45397	--	--	--	--	--	--	--	--	--	--	--	--	--
neg_825	D-Maltose	12686	12204.9	15285.7	2963.43	2874.24	3706.87	1872.01	1976.93	1772.15	-2.07361	0.00566044	1.10943	down	-0.763824	0.0331761	1.07577	down	3.34525	C12H22O11	729.233	0.6552	C00208	--	--	--	--	--	HMDB0000163	69-79-4	Organic compounds	Organic oxygen compounds	Organooxygen compounds	--	Animals
neg_8272	15-deoxy-未-12,14-PGJ2	10556.1	10321.1	9053.24	4190.66	4791.92	4791.96	3109.83	3369.63	3077.94	-1.11961	0.00275928	1.11054	down	-0.527314	0.0094791	1.1099	down	5.72566	C20H28O3	315.198	7.51833	--	--	--	--	--	--	--	--	--	--	--	--	--
neg_8368	Decanoic acid	154.392	156.704	164.256	99.6706	78.2793	78.7521	52.6073	54.819	66.2252	-0.888901	0.00379086	1.10624	down	-0.5639	0.0382019	1.00018	down	27.9288	C10H20O2	193.126	7.66132	--	--	--	--	--	--	--	--	--	--	--	--	--
neg_8373	Nicotine	173.665	159.364	144.933	10.0185	9.79133	12.8465	1.60283e-07	1.60283e-07	0.0404837	-3.87146	0.00278198	1.12306	down	-9.65579	0.00806233	1.14512	down	0.969405	C10H14N2	383.246	7.66132	--	--	--	--	--	--	--	--	--	--	--	--	--
neg_8408	Pristimerin	954.676	1025.62	753.702	433.702	307.636	341.779	175.734	159.32	231.068	-1.33582	0.0104323	1.07468	down	-0.936007	0.0254504	1.03885	down	-9.03494	C30H40O4	987.591	7.68992	--	--	--	--	--	--	--	--	--	--	--	--	--
neg_8421	(卤)7-epi Jasmonic Acid	1698.25	1622.72	2087.73	1289.31	1181.65	1138.71	431.151	447.839	537.561	-0.583415	0.0430315	1.00968	down	-1.34948	0.000317528	1.14991	down	8.54887	C12H18O3	209.12	7.71852	--	--	--	--	--	--	--	--	--	--	--	--	--
neg_846	HYDROXYCITRIC ACID	4348.07	4430.32	4357.68	2570.34	2427.62	2363.12	1902.29	1925.09	2215.28	-0.835544	0.000192692	1.12761	down	-0.284735	0.0285374	1.02495	down	8.05519	C6H8O8	207.016	0.6695	--	--	--	--	--	--	--	--	--	--	--	--	--
neg_8570	Lolitriol	2107.01	2222.13	1943.82	698.752	792.132	812.318	443.755	461.391	320.847	-1.44551	0.00105866	1.12037	down	-0.909691	0.00370396	1.10989	down	43.0362	C37H49NO7	640.352	7.99663	--	--	--	--	--	--	--	--	--	--	--	--	--
neg_8578	Carlactone	462.297	494.409	508.593	363.425	348.374	353.665	272.175	273.63	254.335	-0.459713	0.00611061	1.10499	down	-0.413157	0.00054637	1.14639	down	-19.4739	C19H26O3	649.363	8.01095	--	--	--	--	--	--	--	--	--	--	--	--	--
neg_8755	Geranylhydroquinone	2336.24	2259.08	2322.66	1108.46	1061.95	1113.5	273.991	264.359	297.573	-1.07494	6.44569e-06	1.12891	down	-1.97397	1.29623e-05	1.16207	down	40.1094	C16H22O2	537.342	8.26763	C10793	Ubiquinone and other terpenoid-quinone biosynthesis(ko00130);;Biosynthesis of secondary metabolites(ko01110)	--	--	--	--	--	--	--	--	--	--	--
neg_8772	Cortisol	911.902	893.243	1000.11	568.578	554.849	559.741	467.811	516.773	498.654	-0.736953	0.00700847	1.11283	down	-0.182429	0.0350296	1.06258	down	2.38771	C21H30O5	361.203	8.29623	C00735	Steroid hormone biosynthesis(ko00140);;Metabolic pathways(ko01100);;Neuroactive ligand-receptor interaction(ko04080);;Cortisol synthesis and secretion(ko04927);;Cushing syndrome(ko04934);;Aldosterone-regulated sodium reabsorption(ko04960);;Bile secretion(ko04976);;Pathways in cancer(ko05200);;Prostate cancer(ko05215);;Glucocorticoid and mineralocorticoid receptor agonists/antagonists(ko07225)	LMST02030001	Sterol Lipids [ST]	Steroids [ST02]	C21 steroids (gluco/mineralocorticoids, progestogins) and derivatives [ST0203]	HMDB0000063	50-23-7	Organic compounds	Lipids and lipid-like molecules	Steroids and steroid derivatives	--	Animals
neg_8809	16-Oxopalmitate	768.711	766.363	897.428	258.262	256.632	256.024	168.284	204.995	162.623	-1.65779	0.00604748	1.11667	down	-0.524607	0.0273036	1.10137	down	11.345	C16H30O3	269.215	8.37488	--	--	--	--	--	--	--	--	--	--	--	--	--
neg_8915	Oleandrin	42716.3	43774.3	45652.1	18357.2	18639.1	18725.1	17224.8	17329.1	17166.7	-1.24579	0.000960634	1.12765	down	-0.107494	0.00250068	1.14474	down	1.53358	C32H48O9	597.305	8.58153	C19987	--	LMST01120025	Sterol Lipids [ST]	Sterols [ST01]	Cardanolides and derivatives [ST0112]	--	--	--	--	--	--	--
neg_8918	Megalomicin B	267.282	295.257	261.629	140.974	143.226	143.741	68.4847	103.983	71.3385	-0.945524	0.00587507	1.1165	down	-0.811681	0.0321289	1.09015	down	1.34164	C46H82N2O16	939.542	8.58153	C11986	Biosynthesis of 12-, 14- and 16-membered macrolides(ko00522);;Biosynthesis of secondary metabolites(ko01110)	LMPK04000027	Polyketides [PK]	Macrolides and lactone polyketides [PK04]	-	--	--	--	--	--	--	--
neg_8926	Megalomicin C1	447.165	541.318	595.572	272.837	302.702	331.113	64.867	61.0006	66.7098	-0.805001	0.0232548	1.04524	down	-2.23511	0.0046246	1.15191	down	-30.4441	C48H84N2O17	1005.55	8.60297	C11987	Biosynthesis of 12-, 14- and 16-membered macrolides(ko00522);;Biosynthesis of secondary metabolites(ko01110)	LMPK04000028	Polyketides [PK]	Macrolides and lactone polyketides [PK04]	-	--	--	--	--	--	--	--
neg_8972	11beta-17alpha-21-Trihydroxy-5alpha-pregnane-3,20-dione	619.343	631.765	608.953	122.703	119.4	121.476	75.3672	70.2305	65.4116	-2.35501	0.000130653	1.12984	down	-0.78496	0.00138685	1.15509	down	6.28091	C21H32O5	363.22	8.61728	--	--	--	--	--	--	--	--	--	--	--	--	--
neg_8976	Maslinic Acid	2166.41	2228.14	2198.49	796.822	767.693	774.731	707.212	732.783	709.679	-1.4949	8.0519e-06	1.12982	down	-0.121926	0.00627334	1.08775	down	-18.3233	C30H48O4	493.321	8.61728	--	--	--	--	--	--	--	--	--	--	--	--	--
neg_911	L-2-Aminoadipate adenylate	18089.5	20225.9	16227.1	8766.22	8294.58	7480.01	5025.39	5123.23	5804.43	-1.1522	0.00797704	1.09843	down	-0.62135	0.0050862	1.10965	down	40.1487	C16H23N6O10P	525.11	0.683783	C05560	--	--	--	--	--	HMDB0006941	--	Organic compounds	Nucleosides, nucleotides, and analogues	Purine nucleotides	--	Animals
neg_9147	Ascorbyl stearate	266.649	266.486	256.189	90.3128	87.5493	85.6554	45.0359	41.426	35.0322	-1.58272	6.99087e-05	1.12922	down	-1.11701	0.000951229	1.15251	down	-17.048	C24H42O7	487.284	8.93118	--	--	LMFA07010789	Fatty Acyls [FA]	Fatty esters [FA07]	Wax monoesters [FA0701]	HMDB0038242	10605-09-1	Organic compounds	Lipids and lipid-like molecules	Fatty Acyls	--	Animals
neg_9148	8(R)-HPODE	63726.6	62654.7	70005.6	10638.3	9757.55	10010.6	6838.68	7074.71	7254.03	-2.69125	0.00152143	1.12632	down	-0.522533	0.00233471	1.14348	down	0.975687	C18H32O4	623.453	8.93832	C14831	Linoleic acid metabolism(ko00591)	LMFA02000113	Fatty Acyls [FA]	Octadecanoids [FA02]	Other Octadecanoids [FA0200]	HMDB0004706	143343-95-7	Organic compounds	Lipids and lipid-like molecules	Fatty Acyls	--	Animals
neg_9286	Lochnericine	284.465	298.069	373.393	24.7123	29.7207	29.6127	12.8928	11.1809	7.95953	-3.50765	0.00874944	1.11027	down	-1.39161	0.00149377	1.12767	down	-11.1818	C21H24N2O3	397.173	9.1378	--	--	--	--	--	--	--	--	--	--	--	--	--
neg_9306	Ginsenoside F1	13657	13758.3	20320.5	1127.03	845.797	1013.65	122.094	239.253	179.298	-3.99856	0.0210296	1.08386	down	-2.46569	0.00427114	1.13703	down	1.37268	C36H62O9	637.433	9.1378	--	--	--	--	--	--	--	--	--	--	--	--	--
neg_9424	(3R,2'S)-Myxol 2'-alpha-L-fucoside	273.885	264.528	336.43	192.771	175.334	184.073	135.61	153.692	155.905	-0.663891	0.0359801	1.03835	down	-0.310658	0.0135607	1.0579	down	-43.0972	C46H66O7	751.424	9.24505	--	--	--	--	--	--	--	--	--	--	--	--	--
neg_9501	Fungichromin	5438.62	5456.79	6661.52	1199.73	1077.74	1374.86	850.88	895.115	676.789	-2.26515	0.0057358	1.11265	down	-0.592151	0.0220771	1.02783	down	17.5417	C35H58O12	705.374	9.3952	--	--	--	--	--	--	--	--	--	--	--	--	--
neg_9526	Succinate	615.402	626.463	657.192	526.608	545.724	549.317	383.465	432.834	375.199	-0.227822	0.00649513	1.07943	down	-0.444686	0.00812481	1.12315	down	21.8916	C4H6O4	152.999	9.48027	C00042	Citrate cycle (TCA cycle)(ko00020);;Oxidative phosphorylation(ko00190);;Alanine, aspartate and glutamate metabolism(ko00250);;Lysine degradation(ko00310);;Tyrosine metabolism(ko00350);;Phenylalanine metabolism(ko00360);;Chlorocyclohexane and chlorobenzene degradation(ko00361);;Pyruvate metabolism(ko00620);;Glyoxylate and dicarboxylate metabolism(ko00630);;Propanoate metabolism(ko00640);;Butanoate…	LMFA01170043	Fatty Acyls [FA]	Fatty Acids and Conjugates [FA01]	Dicarboxylic acids [FA0117]	HMDB0000254	110-15-6	Organic compounds	Organic acids and derivatives	Carboxylic acids and derivatives	--	Microbe,Animals,Plants
neg_956	1-(5'-Phosphoribosyl)-5-amino-4-(N-succinocarboxamide)-imidazole	3192.66	3059.11	3161.46	439.782	402.016	505.746	97.4871	109.786	120.89	-2.80436	1.71596e-06	1.1294	down	-2.03785	0.00586178	1.14474	down	-48.419	C13H19N4O12P	489.021	0.704533	--	--	--	--	--	--	--	--	--	--	--	--	--
neg_9575	Arginyl-Arginine	2740.29	2791.71	3054.56	229.474	246.016	238.476	1.60283e-07	1.60283e-07	2.19342	-3.58815	0.00134135	1.12714	down	-8.34653	0.000307269	1.16227	down	0.458947	C12H26N8O3	351.188	9.55177	--	--	--	--	--	--	--	--	--	--	--	--	--
neg_959	ITP	355.11	268.844	341.261	11.4748	15.3677	18.5992	1.60283e-07	1.60283e-07	1.60283e-07	-4.40876	0.00725472	1.11313	down	-26.4939	0.0179907	1.12287	down	-13.0456	C10H15N4O14P3	542.943	0.704533	C00081	Purine metabolism(ko00230);;Metabolic pathways(ko01100);;Nucleotide metabolism(ko01232)	--	--	--	--	HMDB0000189	132-06-9	Organic compounds	Nucleosides, nucleotides, and analogues	Purine nucleotides	--	Microbe,Animals
neg_9728	Xanthoxin	252.731	239.03	220.088	163.14	194.344	180.701	112.071	111.143	118.342	-0.403469	0.0115216	1.02958	down	-0.65598	0.0141798	1.11883	down	17.3911	C15H22O3	499.315	9.58752	C13453	Carotenoid biosynthesis(ko00906);;Biosynthesis of terpenoids and steroids(ko01062);;Metabolic pathways(ko01100);;Biosynthesis of secondary metabolites(ko01110)	--	--	--	--	HMDB0304066	--	Organic compounds	Lipids and lipid-like molecules	Prenol lipids	--	Animals
neg_973	2-Phosphinomethylmalate	460.518	469.414	437.443	410.11	381.915	394.039	165.419	148.89	169.307	-0.205227	0.00905142	1.04402	down	-1.29425	3.7247e-05	1.15886	down	10.7639	C5H9O7P	211.004	0.711683	--	--	--	--	--	--	--	--	--	--	--	--	--
neg_9762	Brassinolide	42202.2	41507.7	42500.3	4826.25	4827.16	4998.02	2421.37	2358.83	2386.7	-3.10672	3.47561e-05	1.13007	down	-1.03162	0.000173699	1.16203	down	1.401	C28H48O6	479.338	9.63043	--	--	--	--	--	--	--	--	--	--	--	--	--
neg_9807	Spheroidenone	9683.97	9318.09	11764.8	5414.32	5749.11	5703.69	1387.3	1365.91	1287.02	-0.867162	0.0242149	1.07262	down	-2.0617	0.000240724	1.16175	down	15.1492	C41H58O2	603.427	9.68047	C15903	Carotenoid biosynthesis(ko00906);;Metabolic pathways(ko01100);;Biosynthesis of secondary metabolites(ko01110)	LMPR01070121	Prenol Lipids [PR]	Isoprenoids [PR01]	C40 isoprenoids (tetraterpenes) [PR0107]	--	--	--	--	--	--	--
neg_9889	Torulene	2221.63	2179.46	2315.89	56.546	46.6753	76.007	6.4931	14.9379	7.43371	-5.22794	0.000196694	1.12941	down	-2.63442	0.0206371	1.09525	down	-10.8579	C40H54	555.391	9.80847	C08613	Carotenoid biosynthesis(ko00906);;Metabolic pathways(ko01100);;Biosynthesis of secondary metabolites(ko01110)	LMPR01070088	Prenol Lipids [PR]	Isoprenoids [PR01]	C40 isoprenoids (tetraterpenes) [PR0107]	--	--	--	--	--	--	--
neg_990	Guanosine 3'-phosphate	1428.92	1456.28	1415.05	930.814	844.666	921.681	664.181	618.063	720.805	-0.67298	0.000621539	1.12328	down	-0.429243	0.00468535	1.09882	down	10.3128	C10H14N5O8P	362.054	0.718833	C06193	Purine metabolism(ko00230);;Metabolic pathways(ko01100)	--	--	--	--	HMDB0240587	117-68-0	Organic compounds	Nucleosides, nucleotides, and analogues	Ribonucleoside 3'-phosphates	--	Animals
neg_9988	4alpha-Carboxy-stigmasta-7,24(24(1))-dien-3beta-ol	26020	25135.7	26773.7	2254.53	2296.01	2481.99	1090.85	996.495	1077	-3.47005	0.000308957	1.12928	down	-1.15213	0.000822519	1.15553	down	-30.7001	C30H48O3	455.339	9.90142	--	--	--	--	--	--	--	--	--	--	--	--	--
pos_1003	Anacardic Acid	830.755	828.281	768.333	583.113	556.652	580.556	260.483	262.329	283.123	-0.496716	0.0029301	1.11089	down	-1.09394	1.27773e-05	1.16029	down	0.357956	C22H36O3	349.274	10.0084	--	--	--	--	--	--	--	--	--	--	--	--	--
pos_1372	13S-HpOTrE(gamma)	30123.8	29372.5	40208.3	7348.74	6406.23	5033.16	1903.75	3207.55	1701.07	-2.40784	0.013829	1.09289	down	-1.46359	0.0108694	1.07509	down	6.03435	C18H30O4	293.213	11.1138	--	--	LMFA02000112	Fatty Acyls [FA]	Octadecanoids [FA02]	Other Octadecanoids [FA0200]	--	--	--	--	--	--	--
pos_1388	Donhexocin	176630	163964	214734	24787.9	23607	24475.4	16912.5	16745.5	17950.8	-2.92994	0.00885265	1.11038	down	-0.497713	0.000167972	1.15127	down	-32.1914	C35H66O8	615.463	11.1352	--	--	--	--	--	--	HMDB0033087	--	Organic compounds	Lipids and lipid-like molecules	Fatty Acyls	--	Animals
pos_1590	3',5'-Cyclic AMP	414.233	417.414	455.832	33.2439	55.3739	36.3027	2.03975	1.52729	0.462841	-3.36547	0.000128305	1.12683	down	-4.95413	0.0278134	1.09932	down	-2.01004	C10H12N5O6P	676.138	2.08157	C00575	Purine metabolism(ko00230);;Metabolic pathways(ko01100);;Endocrine resistance(ko01522);;Biofilm formation - Pseudomonas aeruginosa(ko02025);;Biofilm formation - Escherichia coli(ko02026);;MAPK signaling pathway(ko04010);;Ras signaling pathway(ko04014);;Rap1 signaling pathway(ko04015);;Calcium signaling pathway(ko04020);;cGMP-PKG signaling pathway(ko04022);;cAMP signaling pathway(ko04024);;Chemoki…	--	--	--	--	HMDB0000058	60-92-4	Organic compounds	Nucleosides, nucleotides, and analogues	Purine nucleotides	--	Microbe,Animals
pos_1703	Isopenicillin N	179.206	185.377	187.399	126.637	103.848	102.065	47.0114	49.2144	46.8934	-0.731049	0.00710103	1.1025	down	-1.21636	0.0146806	1.12793	down	34.8519	C14H21N3O6S	382.117	2.23885	--	--	--	--	--	--	HMDB0253667	--	Organic compounds	Organic acids and derivatives	Carboxylic acids and derivatives	--	Animals
pos_1846	2-Hydroxy-6-oxonona-2,4-diene-1,9-dioate	118.263	123.713	119.042	87.8668	92.3972	79.0656	15.4612	23.4612	29.8888	-0.477285	0.00580062	1.09615	down	-1.91407	0.000383108	1.14457	down	13.6178	C9H10O6	256.084	2.38113	--	--	--	--	--	--	--	--	--	--	--	--	--
pos_1856	4-(L-Alanin-3-yl)-2-hydroxy-cis,cis-muconate 6-semialdehyde	75.7547	78.2841	77.7979	56.8256	56.5841	55.7783	39.4889	39.3664	40.8922	-0.454483	0.000321625	1.12671	down	-0.498632	3.5165e-05	1.16031	down	11.2159	C9H11NO6	194.047	2.39543	--	--	--	--	--	--	--	--	--	--	--	--	--
pos_2038	N-Hydroxypipecolic acid	83.4774	84.3209	64.699	50.1698	50.1366	47.9519	37.2771	40.8003	43.6219	-0.649102	0.0466428	1.02711	down	-0.284791	0.027415	1.06194	down	16.9263	C6H11NO3	110.062	2.60993	--	--	--	--	--	--	--	--	--	--	--	--	--
pos_204	2-[(2R,5Z)-2-Carboxy-4-methylthiazol-5(2H)-ylidene]ethyl phosphate	998.834	984.69	964.298	95.8642	81.8882	76.4578	55.3896	51.9213	57.2528	-3.53555	2.39777e-06	1.12985	down	-0.627376	0.0285252	1.07945	down	33.5022	C7H10NO6PS	231.992	0.57655	--	--	--	--	--	--	--	--	--	--	--	--	--
pos_2103	5-O-Methylvisammioside	71.3244	81.2763	94.6827	16.1399	18.3013	21.2866	8.50387	5.36752	2.89856	-2.1497	0.0085579	1.1046	down	-1.73252	0.00423923	1.10185	down	-40.0239	C22H28O10	417.136	2.6886	--	--	--	--	--	--	--	--	--	--	--	--	--
pos_2192	N-Hydroxy-L-tyrosine	2349.77	2325.41	2582.2	1727.92	1688.67	1716.37	1168.16	1159.78	1227.44	-0.499657	0.0118231	1.10065	down	-0.529784	0.000174004	1.15843	down	5.86121	C9H11NO4	180.067	2.80227	--	--	--	--	--	--	HMDB0038750	64448-49-3	Organic compounds	Organic acids and derivatives	Carboxylic acids and derivatives	--	Animals
pos_2193	4-Amino-4-deoxychorismic acid	9297.01	9231.01	10160.4	7005.06	6587.46	6583.44	5028.03	5065.15	5340.18	-0.507831	0.00411819	1.10084	down	-0.386585	0.00124969	1.13692	down	5.32712	C10H11NO5	208.062	2.80227	--	--	--	--	--	--	--	--	--	--	--	--	--
pos_2274	Mimosine	505.035	493.436	421.527	258.728	234.669	239.186	192.349	210.734	212.52	-0.954826	0.00865506	1.09977	down	-0.250992	0.0170103	1.03936	down	-2.34137	C8H10N2O4	419.116	2.85947	--	--	--	--	--	--	--	--	--	--	--	--	--
pos_2305	Demethyldecarbamoylnovobiocin	5388.27	5354.34	4963.8	2830.57	2727.16	2782.62	1903.89	1927.76	2028.95	-0.913176	0.00210684	1.123	down	-0.509055	0.000104604	1.1554	down	3.35879	C29H33NO10	578.202	2.88092	--	--	--	--	--	--	--	--	--	--	--	--	--
pos_2336	(5S,6S)-6-Amino-5-hydroxycyclohexa-1,3-diene-1-carboxylate	1025.32	959.521	1095.87	813.226	748.338	757.182	586.254	591.413	653.011	-0.409916	0.0105853	1.06713	down	-0.340966	0.00534752	1.09347	down	8.3495	C7H9NO3	120.046	2.91667	--	--	--	--	--	--	--	--	--	--	--	--	--
pos_2441	4-Hydroxybenzaldehyde	772.506	740.684	700.793	539.846	543.489	530.536	265.203	271.01	270.296	-0.456118	0.00878434	1.10577	down	-1.00076	1.40448e-05	1.16261	down	12.7042	C7H6O2	123.046	2.98817	C00633	Bisphenol degradation(ko00363);;Toluene degradation(ko00623);;Aminobenzoate degradation(ko00627);;Biosynthesis of phenylpropanoids(ko01061);;Metabolic pathways(ko01100);;Microbial metabolism in diverse environments(ko01120)	--	--	--	--	HMDB0011718	123-08-0	Organic compounds	Organic oxygen compounds	Organooxygen compounds	--	Animals,Plants,Microbe
pos_2442	(S)-2,3,4,5-Tetrahydropyridine-2-carboxylate	36082.6	34629.1	32102.2	25196.2	24439.8	24137.8	13952.2	13772.2	14359.8	-0.478852	0.0100292	1.09668	down	-0.809831	6.5122e-05	1.16053	down	4.19372	C6H9NO2	166.051	2.98817	C00450	Lysine degradation(ko00310);;Tropane, piperidine and pyridine alkaloid biosynthesis(ko00960);;Biosynthesis of plant secondary metabolites(ko01060);;Biosynthesis of alkaloids derived from ornithine, lysine and nicotinic acid(ko01064);;Metabolic pathways(ko01100);;Biosynthesis of secondary metabolites(ko01110)	--	--	--	--	HMDB0012130	73980-78-6	Organic compounds	Organic acids and derivatives	Carboxylic acids and derivatives	--	Animals
pos_2443	N-Methylnicotinate	3385.97	3250.2	2983.63	2254.84	2285.75	2213.31	1458.53	1458.47	1479.11	-0.510287	0.0128826	1.09604	down	-0.619493	0.000234943	1.16131	down	6.04057	C7H7NO2	138.056	2.98817	C01004	Nicotinate and nicotinamide metabolism(ko00760)	--	--	--	--	HMDB0000875	535-83-1	Organic compounds	Alkaloids and derivatives	_	--	Animals,Plants
pos_2448	alpha-D-Ribose 1-phosphate	911.336	977.32	812.715	552.352	544.267	509.565	228.592	217.229	238.684	-0.750056	0.0120645	1.0908	down	-1.2305	0.000319363	1.15794	down	15.0917	C5H11O8P	248.056	2.98817	C00620	Pentose phosphate pathway(ko00030);;Purine metabolism(ko00230);;Metabolic pathways(ko01100)	--	--	--	--	HMDB0001489	14075-00-4	Organic compounds	Organic oxygen compounds	Organooxygen compounds	--	Microbe,Animals
pos_2449	Cytarabine	1550.15	1478.73	1310.98	971.859	911.847	887.903	611.083	610.275	639.556	-0.646925	0.0108792	1.08616	down	-0.574712	0.00284922	1.14544	down	-36.6176	C9H13N3O5	226.073	2.98817	--	--	--	--	--	--	HMDB0248553	--	Organic compounds	Nucleosides, nucleotides, and analogues	Pyrimidine nucleosides	--	Microbe,Animals
pos_2510	(-)-Huperzine A	78.2333	102.88	99.2885	56.0791	49.4884	47.5761	33.002	29.4224	28.6905	-0.872612	0.0222472	1.05617	down	-0.749126	0.00568617	1.1198	down	-6.77403	C15H18N2O	281.103	3.03107	--	--	--	--	--	--	--	--	--	--	--	--	--
pos_2531	UDP-2-acetamido-4-(D-alanylamino)-2,4,6-trideoxy-alpha-D-glucose	1231.42	1287.73	1422.4	1056.57	1048	956.56	690.179	692.511	651.507	-0.364699	0.0182336	1.03343	down	-0.589605	0.00354776	1.13969	down	48.9042	C20H33N5O16P2	703.206	3.04465	--	--	--	--	--	--	--	--	--	--	--	--	--
pos_2650	9-amino-CPT	229.859	214.476	294.019	61.043	72.5474	73.2665	15.5621	15.8207	21.4348	-1.83568	0.0163801	1.08871	down	-1.96954	0.00161324	1.14666	down	4.59068	C20H17N3O4	386.113	3.13047	--	--	--	--	--	--	--	--	--	--	--	--	--
pos_2747	2-Hydroxy-4,7-dimethoxy-2H-1,4-benzoxazin-3(4H)-one	3161.27	3186.84	3098.99	1482.24	1374.22	1371.4	1026.01	980.001	1008.28	-1.15995	7.08245e-06	1.12876	down	-0.48811	0.00384503	1.14229	down	11.8782	C10H11NO5	248.056	3.20197	--	--	--	--	--	--	HMDB0037264	149182-67-2	Organic compounds	Organoheterocyclic compounds	Benzoxazines	--	Animals
pos_2836	Cixiophiopogon A	150.745	161.448	164.741	69.0952	45.3151	59.1793	31.2418	35.6234	25.8695	-1.45811	0.000664766	1.11618	down	-0.9045	0.0443843	1.01841	down	-27.6039	C44H70O18	851.418	3.22342	--	--	--	--	--	--	--	--	--	--	--	--	--
pos_2859	D-Octopine	58.988	62.6395	56.6564	19.3902	14.6739	16.7241	1.60283e-07	1.83708	2.68807	-1.81161	6.51384e-05	1.12423	down	-3.48846	0.00170387	1.13975	down	-16.7876	C9H18N4O4	285.092	3.23772	--	--	--	--	--	--	--	--	--	--	--	--	--
pos_3079	2-Hydroxy-7-methoxy-2H-1,4-benzoxazin-3(4H)-one	9099.12	8728.7	9187.1	3499.05	3376.8	3355.3	2219.84	2289.37	2321.3	-1.40079	0.000213985	1.12863	down	-0.582904	8.37527e-05	1.158	down	5.27193	C9H9NO4	196.061	3.42292	--	--	--	--	--	--	HMDB0038055	17359-53-4	Organic compounds	Organoheterocyclic compounds	Benzoxazines	--	Animals
pos_3152	Stearoyl-CoA	153.097	133.717	141.045	73.158	49.6012	51.1658	16.91	32.3076	24.6602	-1.29867	0.00124466	1.1029	down	-1.23525	0.0284882	1.02842	down	-37.1918	C39H70N7O17P3S	1056.33	3.49442	C00412	Biosynthesis of unsaturated fatty acids(ko01040);;Biosynthesis of plant hormones(ko01070);;Fatty acid metabolism(ko01212)	LMFA07050369	Fatty Acyls [FA]	Fatty esters [FA07]	Fatty acyl CoAs [FA0705]	HMDB0001114	362-66-3	Organic compounds	Lipids and lipid-like molecules	Fatty Acyls	--	Microbe,Animals
pos_3219	8-C-Glucosylnaringenin	534.463	544.642	523.382	214.367	217.595	223.457	177.998	167.903	134.592	-1.28982	4.74045e-05	1.12922	down	-0.447901	0.0422882	1.05722	down	-13.0093	C21H22O10	476.201	3.55162	--	--	--	--	--	--	--	--	--	--	--	--	--
pos_3221	CDP-abequose	253.794	290.257	268.787	174.481	154.446	154.128	59.1497	58.5338	70.4642	-0.750783	0.0019116	1.10219	down	-1.36032	0.000774402	1.14897	down	0.0881571	C15H25N3O14P2	551.115	3.55162	--	--	--	--	--	--	--	--	--	--	--	--	--
pos_3245	Kaempferol	1908.87	1855.25	1989.26	1010.94	892.867	913.025	538.989	551.978	601.548	-1.03034	5.35738e-05	1.12359	down	-0.734904	0.00273412	1.13623	down	9.34748	C15H10O6	287.058	3.56592	C05903	Flavonoid biosynthesis(ko00941);;Flavone and flavonol biosynthesis(ko00944);;Biosynthesis of phenylpropanoids(ko01061);;Metabolic pathways(ko01100);;Biosynthesis of secondary metabolites(ko01110)	LMPK12110003	Polyketides [PK]	Flavonoids [PK12]	Flavones and Flavonols [PK1211]	HMDB0005801	520-18-3	Organic compounds	Phenylpropanoids and polyketides	Flavonoids	--	Microbe,Animals,Plants
pos_3357	Phenylacetylglutamine	247.964	241.899	296.578	164.237	135.93	136.072	80.6305	82.7344	116.794	-0.850221	0.00884463	1.07099	down	-0.638874	0.0277321	1.00725	down	12.906	C13H16N2O4	287.104	3.67317	C05597	--	--	--	--	--	HMDB0062645	28047-15-6	Organic compounds	Organic acids and derivatives	Carboxylic acids and derivatives	--	Animals
pos_3437	Glu Tyr Glu Cys	349.336	377.137	383.493	281.32	289.234	263.18	96.6702	67.6019	77.5348	-0.412857	0.00288695	1.08782	down	-1.78573	7.2668e-05	1.15526	down	-19.0052	C22H30N4O10S	543.165	3.73678	--	--	--	--	--	--	--	--	--	--	--	--	--
pos_3457	Cytidine	416.399	398.126	365.777	304.865	293.449	303.694	97.8002	93.6419	93.7477	-0.387944	0.0196483	1.07363	down	-1.66122	5.8221e-05	1.16249	down	-34.1223	C9H13N3O5	226.074	3.75823	--	--	--	--	--	--	--	--	--	--	--	--	--
pos_3468	4',5-Dihydroxy-7-methoxyflavanone	86.3591	84.4889	75.0775	35.4282	29.2051	30.1128	2.92063	1.60283e-07	1.26748	-1.37608	0.000870658	1.1163	down	-4.4997	0.00120548	1.15198	down	5.31668	C16H14O5	328.119	3.77255	C09833	Flavonoid biosynthesis(ko00941);;Biosynthesis of secondary metabolites(ko01110)	LMPK12140571	Polyketides [PK]	Flavonoids [PK12]	Flavanones [PK1214]	HMDB0030090	2957-21-3	Organic compounds	Phenylpropanoids and polyketides	Flavonoids	--	Animals
pos_3494	Lariciresinol	60.1817	76.9595	69.452	32.3076	39.4307	32.4894	23.8109	16.8393	20.3192	-0.987054	0.00893871	1.07801	down	-0.77358	0.0100776	1.06869	down	-0.0777926	C20H24O6	343.154	3.78685	--	--	--	--	--	--	HMDB0253982	27003-73-2	Organic compounds	Lignans, neolignans and related compounds	Furanoid lignans	--	Animals
pos_3572	L-Histidinal	53.7691	59.7386	50.2204	35.6467	37.9895	40.5038	22.9998	19.0519	17.9084	-0.520498	0.0134972	1.05785	down	-0.92873	0.00101658	1.13366	down	3.48443	C6H9N3O	317.113	3.8512	--	--	--	--	--	--	--	--	--	--	--	--	--
pos_3594	7,8-Dihydroxykynurenate	102.732	94.3522	124.801	15.5124	12.4945	8.36279	2.24207	2.16757	0.0530778	-3.14574	0.00669612	1.10917	down	-3.02674	0.0257691	1.07474	down	-0.320497	C10H7NO5	259.996	3.87978	--	--	--	--	--	--	--	--	--	--	--	--	--
pos_3648	Cyanidin 3-O-(2-O-beta-D-glucuronosyl)-beta-D-glucoside	104.575	99.6001	126.511	77.0978	64.5262	73.5446	56.0737	55.9052	55.1674	-0.619994	0.0277298	1.02242	down	-0.364356	0.0498129	1.05384	down	32.8582	C27H29O17+	667.195	3.8941	--	--	--	--	--	--	--	--	--	--	--	--	--
pos_3676	Biotin sulfoxide	61.7936	52.4334	39.7731	7.13466	8.77048	8.76946	1.60283e-07	0.149785	1.60283e-07	-2.64183	0.0205767	1.08324	down	-7.36399	0.00415724	1.15302	down	-5.93414	C10H16N2O4S	225.068	3.9227	--	--	--	--	--	--	HMDB0249229	10406-89-0	Organic compounds	Organoheterocyclic compounds	Biotin and derivatives	--	Animals
pos_3707	Apiopaeonoside	296.994	255.058	290.644	59.4209	81.6824	79.053	40.6068	51.9644	42.3446	-1.93648	0.000699745	1.1187	down	-0.706468	0.0373932	1.01782	down	5.23936	C20H28O12	502.194	3.95845	--	--	--	--	--	--	--	--	--	--	--	--	--
pos_3712	2-(2'-Methylthio)ethylmalic acid	477.785	468.635	346.706	195.328	266.965	254.475	91.0171	101.698	78.3702	-0.851286	0.0271737	1.01217	down	-1.40276	0.015014	1.11075	down	1.96156	C7H12O5S	226.075	3.97273	--	--	--	--	--	--	--	--	--	--	--	--	--
pos_3790	2-Hydroxy-2,3-dihydrogenistein	540.844	519.04	639.625	92.2106	93.9139	86.9656	68.8228	77.031	81.225	-2.63767	0.00590726	1.11666	down	-0.266184	0.0320028	1.0198	down	31.1857	C15H12O6	289.075	4.06497	--	--	--	--	--	--	--	--	--	--	--	--	--
pos_3822	Geniposide	317.851	319.033	309.947	137.81	131.982	152.766	91.2718	86.6906	92.2226	-1.16396	0.000202314	1.12679	down	-0.6452	0.0102281	1.12837	down	-38.396	C17H24O10	799.233	4.09358	--	--	--	--	--	--	--	--	--	--	--	--	--
pos_3884	N-Succinyl-L-glutamate 5-semialdehyde	228.707	217.897	271.942	46.6641	38.3986	32.1702	19.9888	10.6059	24.4344	-2.6157	0.00451402	1.11425	down	-1.09111	0.023966	1.01271	down	-5.03376	C9H13NO6	254.062	4.15793	C05932	Arginine and proline metabolism(ko00330);;Metabolic pathways(ko01100)	--	--	--	--	HMDB0001180	--	Organic compounds	Organic acids and derivatives	Carboxylic acids and derivatives	--	Animals
pos_3967	4'-O-Desmethylpapaveroxine	225.773	195.987	229.913	112.618	132.19	129.91	53.1748	55.1185	73.5393	-0.798344	0.00393673	1.09159	down	-1.0432	0.00201552	1.12066	down	-10.5358	C21H23NO7	443.177	4.25088	--	--	--	--	--	--	--	--	--	--	--	--	--
pos_3993	(S)-3-Hydroxydodecanoyl-CoA	620.849	604.731	641.553	260.97	239.135	183.542	66.2901	125.537	92.3128	-1.4495	0.000813805	1.12102	down	-1.26665	0.0117824	1.06743	down	0.997189	C33H58N7O18P3S	966.285	4.26518	C05262	--	--	--	--	--	HMDB0003936	72059-49-5	Organic compounds	Lipids and lipid-like molecules	Fatty Acyls	--	Animals
pos_4006	Meropenem	2113.45	1970.05	1359.86	277.787	288.229	290.514	169.698	187.743	195.2	-2.66792	0.0220538	1.08179	down	-0.632162	0.00128251	1.14722	down	4.58532	C17H25N3O5S	384.161	4.28663	--	--	--	--	--	--	HMDB0014898	119478-56-7	Organic compounds	Organoheterocyclic compounds	Lactams	--	Animals
pos_4030	N-(p-Hydroxyphenyl)ethyl p-hydroxycinnamide	55157.1	53362.7	57980.4	1509.09	1413.38	1399.51	853.744	814.016	840.522	-5.26769	0.000613005	1.12882	down	-0.784994	0.00139073	1.15486	down	6.82886	C17H17NO3	284.13	4.32238	--	--	--	--	--	--	HMDB0039521	36417-86-4	Organic compounds	Phenylpropanoids and polyketides	Cinnamic acids and derivatives	--	Animals,Plants
pos_4057	Deoxyloganin	86.8122	90.5731	65.7131	38.9981	47.4222	38.8352	17.7417	19.3303	25.2465	-0.956666	0.0255742	1.0422	down	-1.00714	0.00515204	1.09855	down	25.9269	C17H26O9	357.164	4.34383	--	--	--	--	--	--	HMDB0251007	--	Organic compounds	Lipids and lipid-like molecules	Prenol lipids	--	Animals
pos_4183	Pinobanksin	39919.4	38400.2	41450.3	4945.52	4706.19	4808.53	3508	3464.49	3728.03	-3.0501	0.000586717	1.12878	down	-0.43441	0.000351162	1.14678	down	16.2368	C15H12O5	314.14	4.47898	--	--	--	--	--	--	--	--	--	--	--	--	--
pos_4208	Oxytetracycline	126.619	116.753	80.93	43.5231	35.0463	34.4827	3.89167	1.5852	2.22482	-1.52035	0.0321299	1.04826	down	-3.87567	0.00488449	1.14651	down	-36.0778	C22H24N2O9	425.118	4.50042	C06624	--	--	--	--	--	HMDB0014733	79-57-2	Organic compounds	Phenylpropanoids and polyketides	Tetracyclines	--	Animals
pos_4218	Dipsacoside B	354.893	341.283	387.918	34.1497	25.4165	40.3654	12.2997	8.99049	14.992	-3.4394	0.000764718	1.12581	down	-1.46168	0.026474	1.06559	down	-1.08549	C53H86O22	1097.55	4.52187	--	--	--	--	--	--	--	--	--	--	--	--	--
pos_4226	Aclacinomycin A	2182.63	1965.14	2181.34	448.648	472.88	473.398	159.715	107.533	133.974	-2.18181	0.00172032	1.12574	down	-1.79772	0.000255673	1.15712	down	-19.4522	C42H53NO15	776.312	4.52187	--	--	--	--	--	--	--	--	--	--	--	--	--
pos_429	Hypoxanthine	15721.3	15447.9	17141.2	7525.38	7020.53	7136.54	6176.57	5382.93	6418.22	-1.1558	0.00186844	1.12177	down	-0.270318	0.0401954	1.01361	down	11.6055	C5H4N4O	136.063	0.67665	C00262	Purine metabolism(ko00230);;Metabolic pathways(ko01100);;Nucleotide metabolism(ko01232)	--	--	--	--	HMDB0000157	68-94-0	Organic compounds	Organoheterocyclic compounds	Imidazopyrimidines	--	Microbe,Animals,Plants
pos_4292	Pseudobaptigenin	72.0946	69.2097	69.1136	40.3801	36.0335	37.7227	29.7722	29.7345	24.1093	-0.882498	5.78089e-05	1.12464	down	-0.448909	0.0147554	1.06248	down	19.4488	C16H10O5	300.092	4.60767	C10522	Isoflavonoid biosynthesis(ko00943);;Biosynthesis of secondary metabolites(ko01110)	LMPK12050053	Polyketides [PK]	Flavonoids [PK12]	Isoflavonoids [PK1205]	HMDB0036616	90-29-9	Organic compounds	Phenylpropanoids and polyketides	Isoflavonoids	--	Animals,Plants
pos_4325	Kansuinine A	73.8013	58.4439	77.0409	30.6784	41.8912	39.4918	14.7813	6.53692	16.9558	-0.901188	0.0137477	1.04471	down	-1.54985	0.00625311	1.08794	down	38.5031	C37H46O15	695.298	4.64342	--	--	--	--	--	--	--	--	--	--	--	--	--
pos_4337	Tyr Asn Gly	200.3	195.03	266.59	51.3157	58.7626	68.689	40.9542	34.966	43.467	-1.88857	0.0162767	1.0847	down	-0.582434	0.0401773	1.012	down	14.484	C15H20N4O6	353.151	4.66487	--	--	--	--	--	--	--	--	--	--	--	--	--
pos_4362	Curcumin diglucoside	200.849	192.469	246.754	118.196	137.015	153.422	53.9233	44.428	32.4294	-0.647428	0.0250833	1.00635	down	-1.64366	0.00310369	1.12677	down	35.9657	C33H40O16	710.29	4.69347	--	--	--	--	--	--	--	--	--	--	--	--	--
pos_4384	Homotrypanothione	38.7873	35.435	36.7596	17.7327	12.9387	19.9981	0.066067	2.80936	6.96216	-1.13113	0.00389042	1.10171	down	-2.36474	0.00926747	1.07147	down	-2.82894	C28H51N9O10S2	776.281	4.70777	--	--	--	--	--	--	--	--	--	--	--	--	--
pos_4398	Amprotropine	1119.58	1080.78	895.907	258.274	193.671	187.491	58.1375	52.9165	79.3645	-2.27566	0.00373941	1.11284	down	-1.74763	0.0139533	1.10741	down	10.0516	C18H29NO3	308.225	4.72852	--	--	--	--	--	--	--	--	--	--	--	--	--
pos_4477	Roseoflavin	772.202	736.536	863.034	197.203	183.78	186.508	98.2198	110.445	116.682	-2.0633	0.00356838	1.12135	down	-0.802619	0.00042894	1.14715	down	1.28705	C18H23N5O6	428.155	4.80717	C21647	Biosynthesis of various antibiotics(ko00998);;Metabolic pathways(ko01100);;Biosynthesis of secondary metabolites(ko01110)	--	--	--	--	--	--	--	--	--	--	--
pos_4478	Biliverdin	4713.2	4416.44	5088.42	101.754	196.514	144.57	24.2992	28.6885	16.3323	-5.0048	0.00149649	1.12608	down	-2.67543	0.0430578	1.0628	down	-11.6881	C33H34N4O6	565.238	4.80717	C00500	Porphyrin metabolism(ko00860);;Metabolic pathways(ko01100);;Biosynthesis of secondary metabolites(ko01110)	--	--	--	--	HMDB0001008	114-25-0	Organic compounds	Organoheterocyclic compounds	Tetrapyrroles and derivatives	--	Animals
pos_4480	Neocarzinostatin chromophore	97.5206	106.555	86.6554	53.651	50.5422	44.3418	31.7907	18.2695	11.9718	-0.968882	0.00590051	1.09164	down	-1.25972	0.0235146	1.06129	down	-20.9156	C35H33NO12	677.22	4.81432	--	--	--	--	--	--	HMDB0255490	--	Organic compounds	Organic oxygen compounds	Organooxygen compounds	--	Animals
pos_452	4-Imidazolone-5-propanoate	54.4943	47.2448	49.0502	7.53328	6.25217	12.4765	1.89299	2.20014	1.60283e-07	-2.52149	0.000153619	1.11929	down	-2.6817	0.0469554	1.02186	down	10.7855	C6H8N2O3	121.041	0.697383	C03680	Histidine metabolism(ko00340);;Metabolic pathways(ko01100)	--	--	--	--	HMDB0001014	17340-16-8	Organic compounds	Organoheterocyclic compounds	Azoles	--	Animals
pos_4536	3-Dimethylallyl-4-hydroxyphenylpyruvate	645.436	621.055	664.731	118.06	128.819	134.536	67.8508	67.4865	65.056	-2.34008	0.00012988	1.12864	down	-0.928525	0.00513785	1.14834	down	-19.5034	C14H16O4	266.134	4.85723	--	--	--	--	--	--	--	--	--	--	--	--	--
pos_4538	Citalopram alcohol	1400.72	1402.19	1357.52	119.383	88.0361	86.9295	48.4859	40.7989	47.4868	-3.82114	7.17864e-07	1.12979	down	-1.10576	0.0333028	1.07412	down	0.10939	C19H18FNO2	312.139	4.85723	--	--	--	--	--	--	--	--	--	--	--	--	--
pos_4539	N-Feruloyltyramine	380.752	398.97	397.763	48.0849	45.5745	45.3993	15.0085	19.9	15.8846	-3.08194	0.000219447	1.1296	down	-1.45299	0.000308846	1.15516	down	-2.37467	C18H19NO4	314.138	4.85723	C02717	--	--	--	--	--	HMDB0029365	66648-43-9	Organic compounds	Benzenoids	Phenols	--	Animals,Plants
pos_4554	Veratrosine	453.902	429.28	459.656	230.221	233.082	274.221	122.072	103.921	105.423	-0.864522	0.000641688	1.11439	down	-1.15405	0.00489931	1.13487	down	10.3428	C33H49NO7	610.32	4.87868	--	--	--	--	--	--	--	--	--	--	--	--	--
pos_4560	8(R)-HPETE	76.9588	78.2486	65.1226	37.0856	26.9673	30.3585	16.2376	17.7606	14.5884	-1.22263	0.00185492	1.09801	down	-0.958402	0.0273165	1.07739	down	13.5319	C20H32O4	301.221	4.89298	C04822	Arachidonic acid metabolism(ko00590);;Serotonergic synapse(ko04726)	LMFA03060037	Fatty Acyls [FA]	Eicosanoids [FA03]	Hydroxy/hydroperoxyeicosatetraenoic acids [FA0306]	HMDB04699	--	--	--	--	--	--
pos_4563	Xanthohumol	542.73	555.268	641.468	152.463	244.027	257.259	93.6323	113.899	53.2062	-1.41184	0.00134672	1.09637	down	-1.32614	0.0379825	1.00992	down	-17.5225	C21H22O5	355.139	4.88582	--	--	--	--	--	--	--	--	--	--	--	--	--
pos_4594	Isoelemicin	128.954	135.643	115.502	55.4214	48.0604	50.8677	28.0847	27.9649	21.4328	-1.30018	0.00279206	1.11478	down	-0.994259	0.00113055	1.13123	down	11.0626	C12H16O3	209.12	4.92157	C16975	--	--	--	--	--	HMDB0029867	5273-85-8	Organic compounds	Benzenoids	Phenol ethers	--	Animals,Plants
pos_461	4-Carboxy-4-hydroxy-2-oxoadipate	8804.23	8136.69	8104.76	1149.64	1052.17	1119.69	563.37	501.282	562.031	-2.91465	0.000841708	1.1279	down	-1.0299	0.000176574	1.15441	down	8.43747	C7H8O8	185.01	0.697383	--	--	--	--	--	--	--	--	--	--	--	--	--
pos_4619	1-Deoxy-11beta-hydroxypentalenate	223.992	206.719	228.134	140.861	124.22	132.544	83.2278	72.7807	85.8544	-0.72853	0.000673522	1.11097	down	-0.71722	0.00131817	1.13119	down	13.567	C15H22O3	233.157	4.95018	--	--	--	--	--	--	--	--	--	--	--	--	--
pos_4641	5-Methylthio-D-ribose	124.116	128.551	122.919	89.6847	84.6006	85.8297	78.1082	76.8959	77.1594	-0.529993	8.11712e-05	1.12237	down	-0.164009	0.0210996	1.10202	down	-0.912805	C6H12O4S	145.032	4.97878	C03089	--	--	--	--	--	HMDB0001087	624740-12-1	Organic compounds	Organic oxygen compounds	Organooxygen compounds	--	Animals
pos_4678	Hemiariensin	370.643	347.108	417.432	218.376	219.925	207.841	176.675	183.113	167.329	-0.813003	0.0134223	1.09439	down	-0.293727	0.00296498	1.11368	down	11.2401	C22H24O7	383.153	5.02168	--	--	--	--	--	--	--	--	--	--	--	--	--
pos_4696	(+)-Abscisic acid	220.779	189.644	212.086	155.711	152.466	154.933	139.24	136.382	138.013	-0.426737	0.0280186	1.06608	down	-0.162997	0.000246511	1.14965	down	19.0825	C15H20O4	229.127	5.06385	C06082	--	LMPR0103050001	Prenol Lipids [PR]	Isoprenoids [PR01]	C15 isoprenoids (sesquiterpenes) [PR0103]	HMDB0035140	21293-29-8	Organic compounds	Lipids and lipid-like molecules	Prenol lipids	--	Animals
pos_4697	Met Leu	624.3	594.023	539.706	68.0603	101.884	103.714	39.7697	35.5987	15.8198	-2.68351	0.000509777	1.12331	down	-1.58545	0.016478	1.06011	down	-0.618049	C11H22N2O3S	263.142	5.05672	--	--	--	--	--	--	--	--	--	--	--	--	--
pos_4721	2-Fluoroadenosine	45.2276	43.9191	37.6952	26.9772	29.873	24.5858	16.0143	10.319	5.75714	-0.639293	0.00833799	1.06076	down	-1.34352	0.0161173	1.07738	down	-14.8518	C10H12FN5O4	250.069	5.09247	--	--	--	--	--	--	HMDB0245130	--	Organic compounds	Nucleosides, nucleotides, and analogues	Purine nucleosides	--	Animals
pos_4740	6-Keto-prostaglandin F1alpha	189.438	190.314	226.384	51.7656	46.4603	48.5456	0.317894	1.99763	2.24418	-2.04607	0.00563862	1.11602	down	-5.00849	0.000253516	1.16047	down	9.02571	C20H34O6	388.273	5.10677	C05961	Arachidonic acid metabolism(ko00590);;Metabolic pathways(ko01100)	LMFA03010001	Fatty Acyls [FA]	Eicosanoids [FA03]	Prostaglandins [FA0301]	HMDB0002886	58962-34-8	Organic compounds	Lipids and lipid-like molecules	Fatty Acyls	--	Animals
pos_4757	Furanogermenone	434.304	410.948	464.509	357.39	344.441	350.656	261.579	254.851	267.897	-0.315501	0.0257808	1.05925	down	-0.424276	7.28797e-05	1.15525	down	14.2195	C15H20O2	233.157	5.13535	--	--	--	--	--	--	--	--	--	--	--	--	--
pos_4771	5-O-beta-D-Mycaminosyltylonolide	503.434	489.471	487.017	196.026	219.464	206.445	130.999	118.99	121.852	-1.25069	9.25548e-06	1.12818	down	-0.742077	0.00154455	1.14382	down	-23.3504	C31H51NO10	562.323	5.14967	--	--	--	--	--	--	--	--	--	--	--	--	--
pos_4827	Tryptophyl-Glutamine	45.2458	55.0819	46.0213	1.0315	2.22383	2.01158	1.60283e-07	1.60283e-07	1.60283e-07	-4.79631	0.00406358	1.12015	down	-23.3849	0.0410728	1.07315	down	12.5049	C16H20N4O4	297.139	5.23547	--	--	--	--	--	--	HMDB0029081	--	Organic compounds	Organic acids and derivatives	Carboxylic acids and derivatives	--	Animals
pos_4871	Diosmetin	1062.41	1032.84	1133.65	589.788	557.507	550.628	207.736	208.187	204.751	-0.927274	0.00110081	1.12131	down	-1.45186	0.0010423	1.16056	down	12.582	C16H12O6	301.074	5.28552	C10038	--	LMPK12110824	Polyketides [PK]	Flavonoids [PK12]	Flavones and Flavonols [PK1211]	HMDB0029676	520-34-3	Organic compounds	Phenylpropanoids and polyketides	Flavonoids	--	Animals,Plants
pos_4880	Garbogiol	275.228	264.886	329.844	151.412	142.864	165.132	93.1063	102.132	92.8466	-0.921169	0.0141651	1.07971	down	-0.673282	0.00498659	1.12875	down	12.6287	C18H16O6	329.106	5.29982	--	--	--	--	--	--	--	--	--	--	--	--	--
pos_4951	Anibine	554.768	522.494	597.759	86.988	88.3209	80.9336	65.1111	51.3984	54.9161	-2.7086	0.00192773	1.12537	down	-0.579928	0.00822984	1.10353	down	15.3577	C11H9NO3	221.084	5.39205	C10127	--	--	--	--	--	--	--	--	--	--	--	--
pos_4953	a-L-Arabinofuranosyl-(1->3)-b-D-xylopyranosyl-(1->4)-D-xylose	2221.29	2125.85	2379.72	260.169	247.317	249.358	188.235	196.706	189.28	-3.15187	0.00134344	1.12708	down	-0.398388	0.00048101	1.14904	down	-6.00677	C15H26O13	397.132	5.39205	--	--	--	--	--	--	--	--	--	--	--	--	--
pos_4956	3'-N-Debenzoyl-2'-deoxytaxol	585.704	572.276	625.452	145.509	114.622	142.815	7.87357	13.0875	23.1875	-2.146	6.97207e-05	1.12649	down	-3.19014	0.00219258	1.14487	down	-8.98439	C40H47NO12	756.292	5.39205	--	--	--	--	--	--	--	--	--	--	--	--	--
pos_4985	Nb-p-Coumaroyltryptamine	34368.6	33287.1	36896.6	453.983	433.433	416.544	254.327	235.955	227.463	-6.32518	0.000963301	1.12804	down	-0.861355	0.000223258	1.15227	down	7.35186	C19H18N2O2	307.146	5.44208	--	--	--	--	--	--	--	--	--	--	--	--	--
pos_5026	Ferruginol	117.047	126.274	115.34	62.4262	64.975	60.3128	39.2343	37.3648	31.3208	-0.934086	0.00118644	1.12114	down	-0.798574	0.00187589	1.13899	down	6.33953	C20H30O	328.231	5.485	--	--	--	--	--	--	--	--	--	--	--	--	--
pos_5029	Pro Asp Gly Glu	161.786	146.75	172.437	76.9482	75.3496	55.7028	47.4724	28.4944	27.8383	-1.20937	0.000873008	1.1033	down	-1.00271	0.0209629	1.02254	down	-5.77913	C16H24N4O9	417.159	5.49213	--	--	--	--	--	--	--	--	--	--	--	--	--
pos_5034	Dihydroartemisinin	356.865	346.965	385.352	284.54	268.397	255.246	209.421	214.808	212.061	-0.43049	0.00374439	1.08111	down	-0.344997	0.0184516	1.11359	down	13.8055	C15H24O5	249.152	5.4993	--	--	--	--	--	--	HMDB0242686	1000126-03-8	Organic compounds	Lipids and lipid-like molecules	Prenol lipids	--	Animals
pos_5061	Salicylic acid beta-D-glucoside	74.7712	69.9636	79.8102	41.2385	43.9535	37.5682	18.3368	16.5408	11.5704	-0.871161	0.0011649	1.10823	down	-1.40216	0.000779688	1.13673	down	-40.3331	C13H16O8	301.08	5.52788	--	--	--	--	--	--	HMDB0041271	10366-91-3	Organic compounds	Organic oxygen compounds	Organooxygen compounds	--	Animals
pos_5072	Taurodeoxycholic acid	524.017	516.296	446.786	224.163	305.664	307.318	18.5989	5.89069	5.98523	-0.82895	0.00433616	1.06986	down	-4.77979	0.00900775	1.1393	down	6.78371	C26H45NO6S	464.286	5.53505	C05463	--	LMST05040013	Sterol Lipids [ST]	Steroid conjugates [ST05]	Taurine conjugates [ST0504]	HMDB0000896	516-50-7	Organic compounds	Lipids and lipid-like molecules	Steroids and steroid derivatives	--	Animals
pos_5103	o-Cymene	103.333	98.9227	142.255	46.4087	38.9212	35.531	17.4089	18.7129	19.9739	-1.5112	0.0272636	1.05683	down	-1.10739	0.0173711	1.1122	down	10.1882	C10H14	135.118	5.57793	--	--	--	--	--	--	HMDB0037050	527-84-4	Organic compounds	Benzenoids	Benzene and substituted derivatives	--	Animals,Plants,Microbe
pos_5105	6-Methylthiohexanaldoxime	170.842	159.591	172.282	26.351	23.2731	17.8574	11.8306	8.36514	6.17312	-2.89718	3.2776e-05	1.12782	down	-1.35566	0.0139136	1.06613	down	-6.9394	C7H15NOS	144.083	5.57793	--	--	--	--	--	--	--	--	--	--	--	--	--
pos_5110	Nb-Feruloyltryptamine	12888.7	12641	13695.8	585.949	563.954	501.712	274.129	237.564	237.268	-4.56984	0.000602503	1.12875	down	-1.14092	0.0020334	1.14324	down	7.66974	C20H20N2O3	337.157	5.57793	--	--	--	--	--	--	HMDB0041519	53905-13-8	Organic compounds	Phenylpropanoids and polyketides	Cinnamic acids and derivatives	--	Animals,Plants
pos_5115	Alisol F	428.563	425.585	548.754	43.2218	26.2814	21.4695	0.14512	1.60283e-07	3.71013	-3.94684	0.0072778	1.11081	down	-4.56054	0.0439177	1.05569	down	-0.633782	C30H48O5	489.357	5.57793	--	--	--	--	--	--	--	--	--	--	--	--	--
pos_5144	(3Z)-Phycocyanobilin	5590.24	5465.77	5859.8	3368.07	3202.26	3035.93	2073.45	1925.36	2010.91	-0.816326	0.000109071	1.1217	down	-0.676676	0.00206888	1.14557	down	26.8409	C33H38N4O6	625.258	5.61368	--	--	--	--	--	--	--	--	--	--	--	--	--
pos_5187	Lupinate	261.063	250.969	330.457	26.9489	21.7595	25.4611	5.8222	6.0502	3.6834	-3.50576	0.00917928	1.10924	down	-2.25337	0.00169214	1.14587	down	9.42277	C13H18N6O3	307.149	5.67805	--	--	--	--	--	--	--	--	--	--	--	--	--
pos_5278	6-Keto-PGF1a	290.921	298.613	319.637	228.333	232.989	241.678	176.951	161.129	161.481	-0.371025	0.00673678	1.08996	down	-0.492867	0.000707224	1.14253	down	36.9316	C20H34O6	370.249	5.81318	C05961	Arachidonic acid metabolism(ko00590);;Metabolic pathways(ko01100)	LMFA03010001	Fatty Acyls [FA]	Eicosanoids [FA03]	Prostaglandins [FA0301]	HMDB0002886	58962-34-8	Organic compounds	Lipids and lipid-like molecules	Fatty Acyls	--	Animals
pos_5292	Dihydrozeatin riboside	679.652	695.096	880.002	195.237	340.044	322.388	133.6	129.228	45.2604	-1.39447	0.00568314	1.07039	down	-1.47708	0.0355868	1.00244	down	2.04316	C15H23N5O5	707.349	5.81318	--	--	--	--	--	--	--	--	--	--	--	--	--
pos_5293	Prednisone	634.369	679.237	714.365	191.259	274.064	248.163	142.838	111.688	50.5251	-1.50708	0.000205001	1.11711	down	-1.22583	0.0207064	1.02487	down	-39.7261	C21H26O5	734.361	5.80603	--	--	--	--	--	--	--	--	--	--	--	--	--
pos_5309	6'''-Deamino-6'''-hydroxyneomycin C	1201.17	1241.7	1080.16	634.269	613.602	593.293	213.059	198.622	189.323	-0.936198	0.00519149	1.11275	down	-1.61517	4.61686e-05	1.16062	down	-9.63506	C23H45N5O14	616.298	5.83463	--	--	--	--	--	--	--	--	--	--	--	--	--
pos_5417	1,2-Dihydro-1,1,6-trimethylnaphthalene	109.164	118.263	128.945	34.9114	24.2086	26.5683	11.0139	10.9377	10.1844	-2.05621	0.000627426	1.11854	down	-1.41491	0.0308115	1.09278	down	1.59653	C13H16	173.133	5.99193	--	--	--	--	--	--	HMDB0040284	30364-38-6	Organic compounds	Benzenoids	Naphthalenes	--	Microbe,Animals,Plants
pos_5427	3-Ethyltoluene	60.0416	58.4792	66.787	27.3147	24.7785	24.3916	17.9754	16.3116	17.9439	-1.27668	0.00212907	1.11785	down	-0.55027	0.00351792	1.12451	down	-1.07337	C9H12	121.101	5.9991	--	--	--	--	--	--	--	--	--	--	--	--	--
pos_5432	m-Xylene	50.0604	50.8446	40.1965	25.9579	22.795	26.7807	15.4062	10.4764	11.6658	-0.901541	0.015286	1.07245	down	-1.00837	0.00312693	1.11364	down	19.1431	C8H10	107.088	6.00623	C07208	Xylene degradation(ko00622);;Metabolic pathways(ko01100);;Microbial metabolism in diverse environments(ko01120);;Degradation of aromatic compounds(ko01220)	--	--	--	--	HMDB0059810	108-38-3	Organic compounds	Benzenoids	Benzene and substituted derivatives	--	Animals,Plants
pos_5440	1-Methylnaphthalene	391.911	397.51	453.417	282.59	253.4	277.176	200.715	187.15	210.078	-0.612016	0.00862646	1.08224	down	-0.443543	0.00395639	1.11115	down	13.5069	C11H10	143.087	6.01338	C14082	Naphthalene degradation(ko00626);;Microbial metabolism in diverse environments(ko01120);;Degradation of aromatic compounds(ko01220);;Naphthalene family(ko07114)	--	--	--	--	HMDB0032860	90-12-0	Organic compounds	Benzenoids	Naphthalenes	--	Animals,Plants
pos_5443	N(omega)-Hydroxyarginine	106.062	107.134	131.177	71.6432	76.9187	77.7038	46.7525	43.8549	49.5162	-0.605955	0.0350434	1.03922	down	-0.691318	0.000376091	1.14604	down	-13.3534	C6H14N4O3	155.09	6.01338	C05933	Arginine and proline metabolism(ko00330);;Biosynthesis of various antibiotics(ko00998);;Metabolic pathways(ko01100);;Biosynthesis of secondary metabolites(ko01110)	--	--	--	--	HMDB0004224	53054-07-2	Organic compounds	Organic acids and derivatives	Carboxylic acids and derivatives	--	Animals
pos_5445	Perillic acid	479.905	474.385	522.004	438.191	418.016	422.16	332.761	302.252	319.696	-0.207678	0.0339006	1.01403	down	-0.421168	0.000970575	1.14079	down	10.295	C10H14O2	131.087	6.01338	C11924	Limonene and pinene degradation(ko00903)	LMPR0102090041	Prenol Lipids [PR]	Isoprenoids [PR01]	C10 isoprenoids (monoterpenes) [PR0102]	HMDB0004586	7694-45-3	Organic compounds	Lipids and lipid-like molecules	Prenol lipids	--	Animals
pos_5446	1,4,6-Trimethylnaphthalene	144.849	148.93	160.903	110.251	104.837	99.385	85.0027	85.3071	89.8021	-0.531922	0.00231748	1.09766	down	-0.273802	0.0149008	1.08469	down	-11.5373	C13H14	171.115	6.01338	--	--	--	--	--	--	--	--	--	--	--	--	--
pos_548	4-Oxoproline	7439.59	7417.99	7552.95	4997.76	4214.93	3792.8	2382.8	2493.74	2746.08	-0.785055	0.0115708	1.10238	down	-0.770764	0.028117	1.07542	down	23.1473	C5H7NO3	152.058	0.783183	--	--	--	--	--	--	--	--	--	--	--	--	--
pos_5492	N-(p-Hydroxyphenethyl)actinidine	86.2024	95.2194	80.9874	30.665	32.2619	32.4364	11.4303	5.94882	5.39923	-1.46031	0.00488369	1.11768	down	-2.06577	0.00369154	1.1476	down	5.51921	C18H22NO+	269.179	6.07703	--	--	--	--	--	--	--	--	--	--	--	--	--
pos_5571	Isoalantolactone	11252.7	11079.3	11059	1535.52	1420.43	1430.85	964.229	910.362	955.006	-2.92822	3.08442e-07	1.13009	down	-0.632573	0.00145148	1.14945	down	11.6785	C15H20O2	233.156	6.22717	C09484	--	--	--	--	--	HMDB0035934	470-17-7	Organic compounds	Lipids and lipid-like molecules	Prenol lipids	--	Animals
pos_5675	Cannabidivarin	2132.31	2166.19	2110	223.738	187.351	194.006	69.4333	57.3937	69.2133	-3.40475	3.37227e-07	1.13001	down	-1.62601	0.00317224	1.14603	down	15.8609	C19H26O2	287.204	6.41237	--	--	--	--	--	--	HMDB0249588	--	Organic compounds	Lipids and lipid-like molecules	Prenol lipids	--	Animals
pos_5701	Asiatic acid	183.109	230.357	168.675	6.16164	12.1455	9.41237	1.60283e-07	1.60283e-07	1.60283e-07	-4.39239	0.00953425	1.10789	down	-25.7807	0.0332978	1.08917	down	1.16767	C30H48O5	489.358	6.4481	--	--	--	--	--	--	--	--	--	--	--	--	--
pos_5718	Acacetin	1371.82	1352.74	1505.46	780.331	655.679	642.313	248.379	232.575	230.815	-1.02524	0.000402749	1.11213	down	-1.54594	0.00836656	1.14174	down	17.4241	C16H12O5	285.081	6.4767	C01470	Flavone and flavonol biosynthesis(ko00944)	LMPK12110468	Polyketides [PK]	Flavonoids [PK12]	Flavones and Flavonols [PK1211]	HMDB0132457	480-44-4	--	--	--	--	Plants
pos_5761	Cyathin A3	4268.1	4626.9	5584.66	306.538	231.826	203.325	101.332	102.628	100.439	-4.28707	0.00700933	1.11392	down	-1.28485	0.0417471	1.0712	down	14.2873	C20H30O3	301.221	6.54165	--	--	--	--	--	--	--	--	--	--	--	--	--
pos_5804	Dihydrocapsaicin	2279.05	2427.19	1556.33	375.018	308.955	318.48	249.858	251.02	239.313	-2.64322	0.0222069	1.08025	down	-0.437565	0.0474058	1.04891	down	15.4713	C18H29NO3	272.206	6.63718	C16952	--	LMFA08020318	Fatty Acyls [FA]	Fatty amides [FA08]	N-acyl amines [FA0802]	HMDB0038457	19408-84-5	Organic compounds	Benzenoids	Phenols	--	Animals,Plants
pos_5810	Sulfaphenazole	2174.74	2174.36	2343.69	1222.13	1082.23	1139.67	712.798	672.647	676.407	-0.95851	0.0001844	1.12109	down	-0.740155	0.00434253	1.14399	down	-1.35488	C15H14N4O2S	315.091	6.65205	--	--	--	--	--	--	HMDB0015667	526-08-9	Organic compounds	Organoheterocyclic compounds	Azoles	--	Animals
pos_5817	Decylubiquinol	649.094	757.656	779.292	54.4587	28.6355	41.8847	1.60283e-07	1.60283e-07	1.60283e-07	-4.12856	0.00263467	1.1224	down	-27.9535	0.0305654	1.09552	down	13.1898	C19H32O4	325.242	6.66688	--	--	--	--	--	--	--	--	--	--	--	--	--
pos_5827	Sarcostin	6817.36	7635.1	10281.7	434.647	460.037	430.646	262.715	220.917	59.641	-4.22208	0.0174769	1.0918	down	-1.2866	0.0492678	1.04832	down	-4.17583	C21H34O6	383.241	6.69635	--	--	--	--	--	--	--	--	--	--	--	--	--
pos_5837	Paxilline	292.331	320.345	353.654	70.5445	53.8006	76.1489	33.0654	20.527	18.2647	-2.26896	0.00190521	1.11806	down	-1.48036	0.00867753	1.08813	down	5.70092	C27H33NO4	435.243	6.73943	--	--	--	--	--	--	--	--	--	--	--	--	--
pos_5846	Oleandolide	4098.74	4232.6	4123.66	950.461	661.94	723.087	306.351	305.482	302.901	-2.41493	8.05198e-05	1.12842	down	-1.3523	0.0326621	1.09075	down	9.92836	C20H34O7	351.22	6.76847	C11990	Biosynthesis of 12-, 14- and 16-membered macrolides(ko00522);;Metabolic pathways(ko01100);;Biosynthesis of secondary metabolites(ko01110)	LMPK04000031	Polyketides [PK]	Macrolides and lactone polyketides [PK04]	-	--	--	--	--	--	--	--
pos_5860	10-OPDA	409.988	437.982	430.088	134.953	88.0135	107.918	59.6202	49.0516	39.7191	-1.94955	0.000147395	1.12461	down	-1.15693	0.0318407	1.04665	down	14.5692	C18H28O3	257.194	6.8115	--	--	--	--	--	--	--	--	--	--	--	--	--
pos_5863	15-keto-PGE1	623.643	642.578	805.148	104.021	85.7851	80.8562	1.66765	2.9932	1.60283e-07	-2.93602	0.00833356	1.10973	down	-5.85976	0.00566899	1.14848	down	18.8838	C20H32O5	370.265	6.81867	C04654	--	LMFA03010146	Fatty Acyls [FA]	Eicosanoids [FA03]	Prostaglandins [FA0301]	HMDB0001320	22973-19-9	Organic compounds	Lipids and lipid-like molecules	Fatty Acyls	--	Animals
pos_5869	Nebramine	396.118	391.953	379.424	38.8425	26.1476	35.6526	1.60283e-07	1.60283e-07	5.26857	-3.5361	1.30691e-06	1.12952	down	-4.25569	0.00595814	1.12508	down	-6.84707	C12H26N4O5	289.185	6.84728	--	--	--	--	--	--	--	--	--	--	--	--	--
pos_5895	Gly Arg Lys Trp	242.199	278.736	248.278	165.643	162.392	165.269	60.6292	68.2302	62.2895	-0.640909	0.0141893	1.09755	down	-1.36778	6.75196e-05	1.16182	down	15.5128	C25H39N9O5	546.323	6.93308	--	--	--	--	--	--	--	--	--	--	--	--	--
pos_5948	Ingenol	488.87	443.707	395.811	70.1121	60.7882	58.4274	6.61675	14.1096	10.2605	-2.81072	0.00439718	1.1188	down	-2.61115	0.000660252	1.14886	down	4.82348	C20H28O5	331.192	7.13973	--	--	--	--	--	--	--	--	--	--	--	--	--
pos_5985	17beta-Hydroxy-4-oxa-5alpha-androstan-3-one acetate	18953.4	19085.3	20586.3	5138.34	4511.92	4704.51	2294.82	2074.8	2252.26	-2.02999	0.000401332	1.12707	down	-1.11622	0.00221361	1.14995	down	2.4632	C20H30O4	335.223	7.23983	--	--	--	--	--	--	--	--	--	--	--	--	--
pos_5990	2,6-nonadienoic acid	82.9996	83.4607	94.6236	11.8658	8.48533	7.71994	2.31639	1.60283e-07	2.26396	-3.21736	0.000977468	1.12429	down	-2.61555	0.0106394	1.08746	down	14.5169	C9H14O2	155.109	7.24697	--	--	LMFA01030447	Fatty Acyls [FA]	Fatty Acids and Conjugates [FA01]	Unsaturated fatty acids [FA0103]	--	--	--	--	--	--	--
pos_5995	Traumatic acid	206.709	202.498	299.967	35.8216	40.7767	43.7483	6.75705	1.82137	1.76976	-2.55894	0.0247679	1.0749	down	-3.53975	0.000370414	1.14967	down	16.135	C12H20O4	193.126	7.26127	C16308	alpha-Linolenic acid metabolism(ko00592);;Biosynthesis of secondary metabolites(ko01110)	LMFA01170002	Fatty Acyls [FA]	Fatty Acids and Conjugates [FA01]	Dicarboxylic acids [FA0117]	HMDB0000933	6402-36-4	Organic compounds	Lipids and lipid-like molecules	Fatty Acyls	--	Animals
pos_6006	Buprenorphine	644.749	680.344	683.442	256.79	278.884	281.179	230.686	203.738	190.859	-1.29799	4.70523e-05	1.1272	down	-0.385566	0.0145383	1.06447	down	1.74422	C29H41NO4	468.312	7.28987	C08007	--	--	--	--	--	HMDB0015057	52485-79-7	Organic compounds	Benzenoids	Phenanthrenes and derivatives	--	Animals
pos_6025	5,12-dihydroxy-6,8,10,14,17-eicosapentaenoic acid	12756.6	12668.3	13282.2	3293.48	2662.25	2776.19	1347.02	1258.91	1347.31	-2.14823	3.32526e-06	1.12857	down	-1.14326	0.0130185	1.12943	down	-0.567056	C20H30O4	335.221	7.36853	--	--	--	--	--	--	HMDB0062486	--	Organic compounds	Lipids and lipid-like molecules	Fatty Acyls	--	Animals
pos_6060	12-OPDA	40431.6	40788.5	44527.5	28084.4	24988	25464.7	12590.3	12114.4	12932	-0.679084	0.000958534	1.10697	down	-1.06123	0.00328226	1.15116	down	5.22362	C18H28O3	293.213	7.46792	C01226	alpha-Linolenic acid metabolism(ko00592);;Metabolic pathways(ko01100);;Biosynthesis of secondary metabolites(ko01110)	LMFA02010001	Fatty Acyls [FA]	Octadecanoids [FA02]	12-oxophytodienoic acid metabolites [FA0201]	HMDB0301804	85551-10-6	Organic compounds	Lipids and lipid-like molecules	Fatty Acyls	--	Animals
pos_6068	1,2-dihydrostilbene	32.4333	34.8216	32.0669	12.0517	9.48203	15.5771	1.78573	3.41436	0.659265	-1.42027	0.00209834	1.11048	down	-2.66302	0.0152233	1.09086	down	17.2029	C14H14	183.12	7.51083	C14685	--	LMPK13090043	Polyketides [PK]	Aromatic polyketides [PK13]	Diphenyl ethers, biphenyls, dibenzyls and stilbenes [PK1309]	HMDB0244093	103-29-7	Organic compounds	Phenylpropanoids and polyketides	Stilbenes	--	Animals
pos_6069	11,12,13-Trinor-1,3,5-bisabolatrien-10-oic acid	244	255.694	341.601	126.822	124.908	123.475	48.8105	49.0594	40.7432	-1.16493	0.036943	1.05082	down	-1.43662	0.000374908	1.16007	down	6.50827	C12H16O2	157.102	7.51083	--	--	--	--	--	--	HMDB0039643	--	Organic compounds	Lipids and lipid-like molecules	Prenol lipids	--	Animals
pos_6072	trans-Dehydroandrosterone	1425.63	1596.05	1390.19	410.326	354.277	454.248	253.564	217.537	192.796	-1.85587	0.000895176	1.12072	down	-0.876491	0.00932413	1.09291	down	10.5734	C19H28O2	271.209	7.51083	C01227	Steroid hormone biosynthesis(ko00140);;Steroid degradation(ko00984);;Metabolic pathways(ko01100);;Microbial metabolism in diverse environments(ko01120);;Ovarian steroidogenesis(ko04913);;Pathways in cancer(ko05200);;Prostate cancer(ko05215)	LMST02020021	Sterol Lipids [ST]	Steroids [ST02]	C19 steroids (androgens) and derivatives [ST0202]	HMDB0000077	53-43-0	Organic compounds	Lipids and lipid-like molecules	Steroids and steroid derivatives	--	Animals
pos_6084	15-deoxy-螖12,14-Prostaglandin J2-2-glycerol ester	985.805	1005.51	1179.63	196.336	141.908	131.642	52.3565	46.0798	47.7981	-2.75453	0.00228741	1.11877	down	-1.68403	0.0319765	1.08938	down	3.40171	C23H34O5	391.249	7.52513	--	--	--	--	--	--	--	--	--	--	--	--	--
pos_6097	Lys Val Phe Tyr	825.084	979.021	745.732	145.994	177.427	202.697	83.439	128.231	75.316	-2.27695	0.00745503	1.10646	down	-0.87441	0.0265053	1.00537	down	-3.53806	C29H41N5O6	556.311	7.54658	--	--	--	--	--	--	--	--	--	--	--	--	--
pos_6108	15-keto-Prostaglandin E2	3290.3	3449.88	3683.69	969.261	888.312	882.293	491.58	489.971	464.535	-1.92771	0.0011832	1.12555	down	-0.921951	0.00214048	1.15252	down	2.73143	C20H30O5	315.196	7.58235	C04707	--	LMFA03010030	Fatty Acyls [FA]	Eicosanoids [FA03]	Prostaglandins [FA0301]	HMDB0003175	26441-05-4	Organic compounds	Lipids and lipid-like molecules	Fatty Acyls	--	Animals
pos_6147	13-epi-12-oxo Phytodienoic Acid	81027.5	80619.9	93059.7	33770.8	28086	28551.7	15624	15261.6	19135.7	-1.49431	0.00171282	1.11553	down	-0.853916	0.00545046	1.10564	down	4.43755	C18H28O3	293.212	7.65385	--	--	--	--	--	--	--	--	--	--	--	--	--
pos_6149	C-8 Ceramide	137.757	136.365	105.368	23.5007	26.552	30.6066	10.245	15.2188	17.5968	-2.23415	0.0090637	1.10463	down	-0.905473	0.0138299	1.05059	down	-27.6315	C26H51NO3	390.361	7.64668	--	--	--	--	--	--	--	--	--	--	--	--	--
pos_6158	Pyridostigmine cation	79.1211	79.6803	56.5277	22.9122	26.7706	20.697	1.60283e-07	1.60283e-07	1.60283e-07	-1.61331	0.0195997	1.07513	down	-27.125	0.00567322	1.14983	down	20.4885	C9H13N2O2+	223.135	7.66815	--	--	--	--	--	--	--	--	--	--	--	--	--
pos_6167	4alpha-Carboxy-5alpha-cholesta-8,24-dien-3beta-ol	2651.36	2744.04	2848.36	4.11559	2.62123	2.90601	0.0751235	0.180828	1.64419	-9.73963	0.000429193	1.12928	down	-2.34335	0.0197915	1.02835	down	-30.096	C28H44O3	446.35	7.68243	--	--	--	--	--	--	--	--	--	--	--	--	--
pos_6188	Gibberellin A14 aldehyde	2908.83	2912.54	2935.4	1327.84	1031.73	1044.63	602.642	579.964	720.549	-1.36309	0.00275135	1.12368	down	-0.83892	0.0213007	1.07105	down	2.18984	C20H28O4	333.207	7.71818	C11853	Diterpenoid biosynthesis(ko00904);;Metabolic pathways(ko01100);;Biosynthesis of secondary metabolites(ko01110)	LMPR0104170010	Prenol Lipids [PR]	Isoprenoids [PR01]	C20 isoprenoids (diterpenes) [PR0104]	--	--	--	--	--	--	--
pos_6201	15-HETE-G	3124.94	3507.65	3746.91	1499.67	1479.04	1516.31	609.854	597.887	641.043	-1.20734	0.00824393	1.11151	down	-1.28175	1.10574e-06	1.16249	down	5.95356	C23H38O5	395.282	7.74607	--	--	LMGL01010030	Glycerolipids [GL]	Monoradylglycerols [GL01]	Monoacylglycerols [GL0101]	HMDB0260523	--	Organic compounds	Lipids and lipid-like molecules	Endocannabinoids	--	Animals
pos_6218	Methyl Dihydrojasmonate	228.393	223.56	180.304	78.4393	78.291	69.3776	56.6733	57.6693	60.4714	-1.4835	0.0103042	1.1014	down	-0.371191	0.0189722	1.08855	down	12.1764	C13H22O3	191.146	7.80327	--	--	--	--	--	--	--	--	--	--	--	--	--
pos_6247	Dihydrojasmonic Acid	119.823	120.398	151.402	31.7737	28.2168	38.5097	14.55	14.1065	14.6648	-1.99127	0.0073301	1.10332	down	-1.18505	0.0255737	1.10585	down	14.7992	C12H20O3	177.131	7.85333	--	--	--	--	--	--	--	--	--	--	--	--	--
pos_6256	2E,7-Octadienal	107.583	113.028	113.859	40.1067	33.7521	36.8817	28.5273	24.2075	29.3476	-1.59469	1.05323e-05	1.12737	down	-0.432039	0.0177413	1.03715	down	10.657	C8H12O	125.097	7.86047	--	--	LMFA06000128	Fatty Acyls [FA]	Fatty aldehydes [FA06]	-	--	--	--	--	--	--	--
pos_6271	Linoleoyl ethanolamide	3153.54	3145.84	3250.02	1903.71	1824.03	1717.4	1241.85	1200.01	1304.67	-0.810441	0.000105431	1.12543	down	-0.539414	0.00225983	1.1361	down	9.06532	C20H37NO2	306.282	7.91768	--	--	--	--	--	--	--	--	--	--	--	--	--
pos_6276	1,8-Dimethylnaphthalene	37.4463	38.7019	48.9897	14.242	13.6535	13.9993	3.5629	1.1996	2.77707	-1.57868	0.0167564	1.0929	down	-2.47422	0.0023478	1.15434	down	9.04689	C12H12	157.103	7.95343	--	--	--	--	--	--	--	--	--	--	--	--	--
pos_6278	(6E,8E)-4,6,8-Megastigmatriene	166.519	172.822	182.183	39.0654	32.8601	32.9625	9.50684	8.39887	5.28976	-2.31388	0.000174081	1.12737	down	-2.17693	0.000911024	1.14538	down	-4.0572	C13H20	177.163	7.95343	--	--	--	--	--	--	HMDB0035180	51468-86-1	Organic compounds	Hydrocarbons	Unsaturated hydrocarbons	--	Animals
pos_6279	4-n-Hexylphenol	164.92	164.49	169.856	42.7176	38.9525	39.2407	10.016	5.67502	4.0261	-2.04587	1.62498e-06	1.12961	down	-2.61642	0.000224511	1.15382	down	13.8347	C12H18O	179.146	7.95343	--	--	--	--	--	--	--	--	--	--	--	--	--
pos_6280	Dihydroactinidiolide	524.475	550.403	565.358	304.707	267.127	228.524	139.822	130.191	129.891	-1.03519	0.00134549	1.11275	down	-1.00099	0.0240356	1.10314	down	13.6718	C11H16O2	383.279	7.95343	--	--	--	--	--	--	--	--	--	--	--	--	--
pos_6281	Benzyl hexanoate	836.308	819.499	845.222	318.894	297.478	293.874	201.394	196.401	189.526	-1.45819	1.0656e-06	1.12928	down	-0.632107	0.00163515	1.14878	down	5.29794	C13H18O2	171.118	7.95343	--	--	--	--	--	--	HMDB0032176	6938-45-0	Organic compounds	Benzenoids	Benzene and substituted derivatives	--	Animals,Plants
pos_6283	Heptadecatrienal	6130.77	6136.57	6495.04	1426.93	1352	1314.32	463.086	441.904	458.722	-2.19652	0.000267464	1.12877	down	-1.58571	0.000920317	1.16	down	11.348	C17H28O	249.223	7.95343	C16343	--	--	--	--	--	HMDB0041333	56797-44-5	Organic compounds	Lipids and lipid-like molecules	Fatty Acyls	--	Animals
pos_6286	13(S)-HOTrE	51840.9	50966.5	55727.8	15282.8	14803.4	14296.1	6211.97	5923.91	5992.63	-1.83675	0.00103863	1.12678	down	-1.29172	0.000431429	1.16047	down	5.53728	C18H30O3	277.218	7.95343	--	--	--	--	--	--	--	--	--	--	--	--	--
pos_6302	11-Deoxycortisol	321.201	335.218	331.424	181.417	173.577	170.594	118.816	125.065	127.126	-0.910348	1.44582e-05	1.12766	down	-0.502488	0.000322368	1.14882	down	12.9288	C21H30O4	329.216	7.98203	--	--	--	--	--	--	HMDB0257139	152-58-9	Organic compounds	Lipids and lipid-like molecules	Steroids and steroid derivatives	--	Animals
pos_6303	Periplogenin	1594.78	1606.5	1638.27	273.814	302.109	260.414	167.839	158.166	152.464	-2.53272	2.01165e-07	1.12983	down	-0.805661	0.00537978	1.13577	down	7.70999	C23H34O5	391.251	7.98203	--	--	--	--	--	--	HMDB0256345	514-39-6	Organic compounds	Lipids and lipid-like molecules	Steroids and steroid derivatives	--	Animals
pos_6308	8-Methylthiooctanaldoxime	310.818	316.801	323.657	136.357	155.407	144.675	64.3522	66.5768	49.4445	-1.12408	4.01555e-05	1.12685	down	-1.27479	0.000378475	1.14458	down	13.6329	C9H19NOS	379.25	7.98918	C17251	Glucosinolate biosynthesis(ko00966);;2-Oxocarboxylic acid metabolism(ko01210)	--	--	--	--	--	--	--	--	--	--	--
pos_6345	3alpha-Hydroxy-3,5-dihydromonacolin L acid	505.981	507.295	621.204	292.552	296.182	287.633	155.236	133.996	163.578	-0.899223	0.0217077	1.08174	down	-0.952629	0.00219432	1.15358	down	-14.288	C19H32O5	363.209	8.03922	--	--	--	--	--	--	--	--	--	--	--	--	--
pos_6360	PGE3 1,15-lactone	6931.02	6897.96	7708.89	3335.78	2754.57	2609.77	1511.36	1415.55	1840.68	-1.30777	0.000291406	1.11585	down	-0.867774	0.012264	1.08308	down	-13.7386	C20H28O4	333.201	8.06068	--	--	LMFA03010199	Fatty Acyls [FA]	Eicosanoids [FA03]	Prostaglandins [FA0301]	--	--	--	--	--	--	--
pos_6416	LysoPC(18:1(11Z))	27541.7	28691.6	33885	20319.1	20009.7	19740.3	14635.4	14607.3	14384.3	-0.5852	0.0350841	1.05275	down	-0.461401	0.000120346	1.16051	down	2.39463	C26H52NO7P	522.357	8.1672	C04230	--	LMGP01050138	Glycerophospholipids [GP]	Glycerophosphocholines [GP01]	Monoacylglycerophosphocholines [GP0105]	HMDB0010385	--	Organic compounds	Lipids and lipid-like molecules	Glycerophospholipids	--	Animals
pos_6420	Ecgonine	117.573	118.289	148.384	50.3254	57.0693	50.0966	39.2856	43.6269	37.095	-1.28676	0.0140857	1.08969	down	-0.392146	0.0147503	1.04881	down	45.3016	C9H15NO3	203.147	8.1815	--	--	--	--	--	--	--	--	--	--	--	--	--
pos_6423	(-)-Menthol	3136.92	3147.5	3514.15	1576.27	1403.53	1345.44	856.608	851.467	912.254	-1.17979	0.000811332	1.11683	down	-0.723029	0.0101326	1.12742	down	25.9014	C10H20O	179.145	8.20295	--	--	--	--	--	--	--	--	--	--	--	--	--
pos_6445	2-Methyl-4-pentenal	39.5555	41.7615	46.5608	8.89161	9.55966	5.84917	2.32128	1.60283e-07	1.06768	-2.39571	0.00056556	1.11987	down	-2.84207	0.0110391	1.0867	down	13.2699	C6H10O	99.0817	8.2387	--	--	--	--	--	--	HMDB0030332	5187-71-3	Organic compounds	Organic oxygen compounds	Organic oxides	--	Animals
pos_6448	JWH 210-d9	304.103	323.742	314.774	104.544	123.492	112.771	53.1822	50.3504	31.7101	-1.46772	1.43831e-05	1.12678	down	-1.3334	0.00164687	1.12735	down	1.18368	C26H18D9NO	379.273	8.24587	--	--	--	--	--	--	--	--	--	--	--	--	--
pos_6456	11,14,15-THETA	270.423	274.457	375.435	131.404	119.727	110.985	35.6434	27.8596	33.0737	-1.34567	0.0294171	1.05847	down	-1.90671	0.00166601	1.15132	down	12.2919	C20H34O5	377.234	8.27445	C14814	Arachidonic acid metabolism(ko00590);;Metabolic pathways(ko01100)	LMFA03050018	Fatty Acyls [FA]	Eicosanoids [FA03]	Hydroxy/hydroperoxyeicosatrienoic acids [FA0305]	HMDB0004694	--	Organic compounds	Lipids and lipid-like molecules	Fatty Acyls	--	Animals
pos_6460	Ethylbenzene	334.235	334.937	383.912	184.744	173.753	173.037	145.153	143.668	151.465	-0.986389	0.00653318	1.10957	down	-0.271716	0.00444789	1.11579	down	14.5857	C8H10	107.087	8.28875	C07111	Ethylbenzene degradation(ko00642);;Metabolic pathways(ko01100);;Microbial metabolism in diverse environments(ko01120);;Degradation of aromatic compounds(ko01220)	--	--	--	--	HMDB0059905	100-41-4	Organic compounds	Benzenoids	Benzene and substituted derivatives	--	Animals,Plants
pos_6461	4-Isopropylbenzyl alcohol	1184.62	1198.77	1397.88	370.033	314.266	338.082	255.731	256.268	261.359	-1.88694	0.00387271	1.11714	down	-0.402725	0.034479	1.0834	down	14.9817	C10H14O	151.114	8.28875	C06576	Xylene degradation(ko00622);;Metabolic pathways(ko01100);;Microbial metabolism in diverse environments(ko01120);;Degradation of aromatic compounds(ko01220)	--	--	--	--	HMDB0031817	536-60-7	Organic compounds	Lipids and lipid-like molecules	Prenol lipids	--	Animals,Plants
pos_6466	Sterol	6478.23	6589.19	7571.65	3016.06	2728.69	2658.49	1683.01	1686.28	1733.56	-1.29636	0.00401679	1.11269	down	-0.719642	0.0085971	1.14028	down	7.90417	C17H28O	249.223	8.28875	C00370	--	--	--	--	--	HMDB0060512	--	Organic compounds	Lipids and lipid-like molecules	Steroids and steroid derivatives	--	Animals
pos_6467	9,12-Octadecadiynoic Acid	150714	148609	175206	61864.1	56505.5	55665.5	41506.6	40459.1	42740.2	-1.44712	0.00524768	1.11338	down	-0.480849	0.00807619	1.12857	down	10.1362	C18H28O2	277.217	8.28875	--	--	--	--	--	--	--	--	--	--	--	--	--
pos_6473	4-hydroxy Nonenal Alkyne	101.971	100.64	121.013	39.7656	37.6319	34.9715	23.9294	26.124	31.0969	-1.52608	0.00667623	1.11019	down	-0.469575	0.0199268	1.0456	down	16.3372	C9H12O2	153.093	8.29592	--	--	--	--	--	--	--	--	--	--	--	--	--
pos_6474	(-)-alpha-Terpineol	522.887	541.878	592.412	201.716	191.497	185.479	157.354	124.791	124.171	-1.51786	0.00222976	1.12245	down	-0.510192	0.0212673	1.07396	down	44.4295	C10H18O	193.128	8.29592	--	--	--	--	--	--	--	--	--	--	--	--	--
pos_6487	Colnelenic acid	39.8232	46.3945	34.3207	15.5964	12.6154	17.4865	1.60283e-07	1.00703	1.97415	-1.39928	0.0102858	1.0821	down	-3.93818	0.00437745	1.13783	down	8.97153	C18H28O3	257.193	8.31737	C16320	alpha-Linolenic acid metabolism(ko00592);;Biosynthesis of secondary metabolites(ko01110)	LMFA10000002	Fatty Acyls [FA]	Fatty ethers [FA10]	-	HMDB0030996	52591-16-9	Organic compounds	Lipids and lipid-like molecules	Fatty Acyls	--	Animals,Plants
pos_6501	9-OxoODE	20350.2	20708.6	23635.8	15922.2	13718.8	13819.7	8237.65	8034.97	8533.73	-0.573936	0.00705845	1.06453	down	-0.808999	0.0106926	1.13219	down	5.27239	C18H30O3	295.228	8.34595	C14766	Linoleic acid metabolism(ko00591)	LMFA02000274	Fatty Acyls [FA]	Octadecanoids [FA02]	Other Octadecanoids [FA0200]	HMDB0004669	--	Organic compounds	Lipids and lipid-like molecules	Fatty Acyls	--	Animals
pos_6520	8,9-DHET	424.888	426.511	354.726	148.038	128.907	113.028	59.3668	47.4375	47.5156	-1.62894	0.00280343	1.11055	down	-1.33745	0.00868273	1.12075	down	16.7555	C20H34O4	321.248	8.41675	C14773	Arachidonic acid metabolism(ko00590);;Metabolic pathways(ko01100);;Serotonergic synapse(ko04726)	LMFA03050006	Fatty Acyls [FA]	Eicosanoids [FA03]	Hydroxy/hydroperoxyeicosatrienoic acids [FA0305]	HMDB0002311	192461-96-4	Organic compounds	Lipids and lipid-like molecules	Fatty Acyls	--	Animals
pos_6533	13,14-dihydroxy-11-mulinen-20-oic acid	2782.86	2901.55	3699.54	572.861	568.78	579.618	476.14	435.109	401.851	-2.44673	0.0124535	1.10263	down	-0.390486	0.0221054	1.10819	down	2.71787	C21H34O4	351.254	8.4811	--	--	LMPR0104360001	Prenol Lipids [PR]	Isoprenoids [PR01]	C20 isoprenoids (diterpenes) [PR0104]	--	--	--	--	--	--	--
pos_6539	6alpha-Hydroxy-castasterone	25089.5	23957.9	30729	1309.42	1233.4	1172.89	825.798	796.726	788.267	-4.42426	0.0067373	1.1151	down	-0.624128	0.00508376	1.14277	down	-23.7011	C28H50O5	505.318	8.50972	--	--	--	--	--	--	--	--	--	--	--	--	--
pos_6562	cis-3-Hexenyl hexanoate	1201.44	1190.32	1542.92	477.512	483.162	571.242	337.736	380.026	341.324	-1.36091	0.0153617	1.08293	down	-0.532519	0.0213014	1.07261	down	-2.63584	C12H22O2	163.148	8.57405	--	--	LMFA07010594	Fatty Acyls [FA]	Fatty esters [FA07]	Wax monoesters [FA0701]	HMDB0033378	31501-11-8	Organic compounds	Lipids and lipid-like molecules	Fatty Acyls	--	Animals,Plants
pos_6563	Tricycloekasantalol	135.817	125.968	148.856	24.7975	24.3741	25.8347	7.02845	8.94719	7.34073	-2.4528	0.00337881	1.1223	down	-1.68567	4.03217e-05	1.15914	down	6.75613	C12H20O	181.16	8.57405	--	--	--	--	--	--	HMDB0039339	16933-12-3	Organic compounds	Lipids and lipid-like molecules	Prenol lipids	--	Animals
pos_6566	5beta-Pregnane-3alpha,17alpha,20alpha-triol	55054.7	54502.7	62727.6	45855.6	45648.7	45781.1	43210.4	43381.9	43412.4	-0.327618	0.0479983	1.02871	down	-0.0786156	1.00751e-05	1.16033	down	3.82207	C21H36O3	337.275	8.57405	--	--	--	--	--	--	HMDB0006070	27178-64-9	Organic compounds	Lipids and lipid-like molecules	Steroids and steroid derivatives	--	Animals
pos_6572	2E,4E-undecadienoic acid	1974.01	1881.66	2130.14	109.313	103.561	97.9202	14.0017	12.5307	9.79171	-4.26751	0.001438	1.12689	down	-3.09696	0.000364516	1.15973	down	9.23999	C11H18O2	183.14	8.58122	--	--	LMFA01030222	Fatty Acyls [FA]	Fatty Acids and Conjugates [FA01]	Unsaturated fatty acids [FA0103]	--	--	--	--	--	--	--
pos_6578	3R,4S-epoxy-6Z,9Z-heptadecadiene	3524.24	3460.7	3829.69	124.593	114.563	110.652	10.6684	15.2581	13.0178	-4.95027	0.00105021	1.12782	down	-3.16708	0.000654633	1.15908	down	9.84982	C17H30O	251.239	8.58835	--	--	LMFA12000273	Fatty Acyls [FA]	Oxygenated hydrocarbons [FA12]	-	--	--	--	--	--	--	--
pos_6581	Aphidicolin	539.471	535.879	570.218	154.05	143.116	144.481	78.549	71.7172	91.0219	-1.89762	0.00026323	1.12841	down	-0.872137	0.00135493	1.14114	down	35.1802	C20H34O4	356.291	8.60267	--	--	--	--	--	--	--	--	--	--	--	--	--
pos_6588	(+)-Myrtenyl formate	178.299	176.925	187.445	36.3772	38.9302	33.1791	17.7258	12.1809	11.0998	-2.32256	4.16299e-05	1.12876	down	-1.40359	0.00125429	1.13206	down	10.9116	C11H16O2	145.103	8.6098	--	--	--	--	--	--	HMDB0036669	72928-52-0	Organic compounds	Lipids and lipid-like molecules	Prenol lipids	--	Animals
pos_6589	Undecanoic Acid	438.61	423.386	487.225	98.0715	94.6507	90.3812	51.1844	52.2148	45.8863	-2.25273	0.00262502	1.12356	down	-0.923256	0.000126056	1.15291	down	-1.24493	C11H22O2	209.156	8.6098	--	--	--	--	--	--	--	--	--	--	--	--	--
pos_6591	6,8-Diethyl-4-methyl-3E,5E,7E,9E-dodecatetraene	837.435	820.955	932.106	48.9685	46.0962	52.2108	18.8455	11.4514	16.7912	-4.13664	0.00176159	1.12615	down	-1.64508	0.000378876	1.14725	down	13.4935	C17H28	233.23	8.6098	--	--	LMFA11000058	Fatty Acyls [FA]	Hydrocarbons [FA11]	-	--	--	--	--	--	--	--
pos_6593	17-octadecen-9-ynoic acid	74290.9	72459.7	81414.1	9894.97	9210.69	9239.61	5411.78	5239.43	5639.98	-3.00889	0.00157765	1.12642	down	-0.799016	0.00052966	1.15422	down	6.18885	C18H30O2	279.234	8.6098	--	--	LMFA01030562	Fatty Acyls [FA]	Fatty Acids and Conjugates [FA01]	Unsaturated fatty acids [FA0103]	--	--	--	--	--	--	--
pos_6595	cis-9,10-Epoxystearic acid	2493.77	2436.42	2668.14	396.426	350.742	375.802	215.504	197.973	218.289	-2.75836	0.000727095	1.12779	down	-0.829859	0.00185027	1.14523	down	-1.24985	C18H34O3	298.25	8.6098	C19418	Cutin, suberine and wax biosynthesis(ko00073)	LMFA02000326	Fatty Acyls [FA]	Octadecanoids [FA02]	Other Octadecanoids [FA0200]	HMDB0247617	13980-07-9	Organic compounds	Lipids and lipid-like molecules	Fatty Acyls	--	Animals
pos_6605	9R,10S-EpOME	18267.3	17299.5	19989.3	1174.22	1138.04	1086.79	619.384	648.999	664.612	-4.03074	0.0020221	1.1256	down	-0.814291	0.000422819	1.1552	down	9.59088	C18H32O3	319.227	8.61697	C14825	Linoleic acid metabolism(ko00591);;Metabolic pathways(ko01100)	LMFA02000283	Fatty Acyls [FA]	Octadecanoids [FA02]	Other Octadecanoids [FA0200]	HMDB04701	--	--	--	--	--	Plants
pos_6635	6-[5]-ladderane-1-hexanol	4194.48	4051.28	4682.86	2529.13	2616.26	2580.47	1768.36	1709.05	1717.92	-0.742801	0.0108916	1.10323	down	-0.572482	2.41207e-05	1.16003	down	11.2254	C18H28O	261.224	8.72422	--	--	LMFA05000063	Fatty Acyls [FA]	Fatty alcohols [FA05]	-	--	--	--	--	--	--	--
pos_6674	3-(4-Isopropylphenyl)propanal	153.982	155.5	158.67	135.438	130.018	139.282	95.9984	101.137	102.311	-0.20999	0.00607581	1.08676	down	-0.434685	0.000728564	1.14343	down	-8.85322	C12H16O	177.161	8.83077	--	--	--	--	--	--	HMDB0036171	7775-00-0	Organic compounds	Lipids and lipid-like molecules	Prenol lipids	--	Animals
pos_6723	Cassine	5978.65	6045.06	6614.69	536.987	473.059	506.334	363.045	399.662	373.317	-3.61958	0.001151	1.12741	down	-0.416636	0.00772142	1.10215	down	6.76172	C18H35NO2	298.276	8.97377	--	--	--	--	--	--	--	--	--	--	--	--	--
pos_6828	Ginsenoside Rg5	1842.56	1997.96	1661.47	880.587	693.244	881.624	558.066	533.548	498.726	-1.16396	0.00184461	1.10211	down	-0.626656	0.0362563	1.06134	down	-1.05864	C42H70O12	808.52	9.13748	--	--	--	--	--	--	--	--	--	--	--	--	--
pos_6920	delta-Tocotrienol	117.585	123.071	163.099	29.5765	41.9526	42.2157	11.6594	3.34333	5.78442	-1.82768	0.0153929	1.07985	down	-2.45203	0.00606748	1.11035	down	-27.7535	C27H40O2	361.278	9.27333	--	--	--	--	--	--	--	--	--	--	--	--	--
pos_6941	Cyclooctat-9-ene-5,7-diol	270.718	291.548	285.868	222.383	212.313	223.606	66.4186	102.108	109.649	-0.365545	0.00239387	1.10249	down	-1.24275	0.00749987	1.13674	down	6.43967	C20H34O2	307.265	9.31625	--	--	--	--	--	--	--	--	--	--	--	--	--
pos_6967	cis-5,6-Dihydro-5,6-dihydroxy-carotene	17506.9	17815	22303.8	4797.95	4635.03	5008.58	3337.58	3793.87	3582.92	-1.99649	0.0111053	1.10481	down	-0.430679	0.00217795	1.12214	down	-19.8312	C40H58O2	571.445	9.39488	--	--	--	--	--	--	HMDB0002746	143167-26-4	Organic compounds	Lipids and lipid-like molecules	Prenol lipids	--	Animals
pos_7041	Irinotecan	3685.55	3574.92	4243.99	259.48	229.766	233.223	160.316	157.189	157.001	-3.99311	0.00325023	1.12278	down	-0.60651	0.0118151	1.134	down	13.2453	C33H38N4O6	609.276	9.52287	C16641	Drug metabolism - other enzymes(ko00983)	--	--	--	--	HMDB0014900	100286-90-6	Organic compounds	Alkaloids and derivatives	Camptothecins	--	Animals
pos_7144	Prostaglandin D2-biotin	21023.8	20729.3	31482.4	6812.06	6984.74	5977.43	3931.37	5513.22	4156.77	-1.88892	0.0363069	1.05001	down	-0.53987	0.0321928	1.01098	down	3.51943	C36H60N4O6S	677.457	9.57292	--	--	--	--	--	--	--	--	--	--	--	--	--
pos_716	Guanine	1275.31	1223.61	1218.81	875.346	845.18	827.639	530.97	531.196	533.12	-0.544966	0.000106729	1.12251	down	-0.675644	0.00187778	1.15869	down	10.1405	C5H5N5O	152.058	0.976233	C00242	Purine metabolism(ko00230);;Metabolic pathways(ko01100);;Nucleotide metabolism(ko01232)	--	--	--	--	HMDB0000132	73-40-5	Organic compounds	Organoheterocyclic compounds	Imidazopyrimidines	--	Microbe,Animals
pos_7160	17alpha-Hydroxyprogesterone	35315.3	33062	37301	3241.92	4068.64	4132.94	2584.59	2634.55	2298.09	-3.20708	0.000918475	1.12657	down	-0.606256	0.0327971	1.05425	down	-5.21592	C21H30O3	661.443	9.59437	C01176	Steroid hormone biosynthesis(ko00140);;Metabolic pathways(ko01100);;Ovarian steroidogenesis(ko04913);;Cortisol synthesis and secretion(ko04927);;Cushing syndrome(ko04934)	LMST02030161	Sterol Lipids [ST]	Steroids [ST02]	C21 steroids (gluco/mineralocorticoids, progestogins) and derivatives [ST0203]	HMDB0000374	68-96-2	Organic compounds	Lipids and lipid-like molecules	Steroids and steroid derivatives	--	Animals
pos_7301	cis-Abienol	5696.41	4897.96	2599.56	410.54	347.029	420.441	291.702	316.301	279.639	-3.48545	0.04966	1.0252	down	-0.4083	0.034983	1.03076	down	7.39883	C20H34O	308.297	9.85107	--	--	--	--	--	--	--	--	--	--	--	--	--
pos_7374	22-Oxodocosanoate	5818.91	5712.77	6668.14	725.921	763.499	884.413	257.763	251.896	243.118	-2.93863	0.0026926	1.12269	down	-1.65692	0.00737328	1.14567	down	-27.6618	C22H42O3	354.303	9.90827	--	--	--	--	--	--	--	--	--	--	--	--	--
pos_7384	Hebevinoside IV	41537.6	40814.4	39926.3	23064.5	20753	23091	12075.8	11533.7	11725.7	-0.869907	0.000143702	1.12483	down	-0.921089	0.00406279	1.15061	down	7.99069	C36H60O7	587.434	9.93687	--	--	--	--	--	--	HMDB0036060	101365-06-4	Organic compounds	Lipids and lipid-like molecules	Steroids and steroid derivatives	--	Animals
pos_7385	Ginsenoside Rh3	191865	176584	198327	75247.3	75523.9	77051.5	22930.1	20993	22970	-1.31487	0.00305295	1.1228	down	-1.76798	5.18781e-07	1.16271	down	2.60883	C36H60O7	627.425	9.94402	--	--	--	--	--	--	--	--	--	--	--	--	--
pos_7391	2(R)-HPOT	22731.4	21146.4	22687.3	8329.44	8657.16	9302.2	5826.84	5273.51	5993.09	-1.34032	0.000151458	1.12573	down	-0.621005	0.00139355	1.13298	down	-4.81105	C18H30O4	643.415	9.95117	--	--	--	--	--	--	--	--	--	--	--	--	--
pos_883	DIBOA	1322.71	1272.56	1381.16	806.339	751.226	721.546	478.213	485.673	554.523	-0.803002	0.000200104	1.1191	down	-0.585911	0.0018776	1.12175	down	3.64665	C8H7NO4	164.035	1.78913	C15770	Benzoxazinoid biosynthesis(ko00402);;Biosynthesis of secondary metabolites(ko01110)	--	--	--	--	HMDB0033733	17359-54-5	Organic compounds	Organoheterocyclic compounds	Benzoxazines	--	Animals
